# Supplementary material
Source: Royal Society of Chemistry journal article supplement (doi:10.1039/d6ma00033a)
Supplement: d6ma00033a1.pdf [file d6ma00033a1.pdf]

## **Supporting Information**

### **Highly stable fluorescent coordination polymer materials for the ultrafast detection of nitrofurans in aqueous medium at ppb level**

Alokananda Chanda and Sanjay K. Mandal\*

*Department of Chemical Sciences, Indian Institute of Science Education and Research  
Mohali, Mohali, Punjab 140306, India*

\*Author for correspondence:

Prof. Sanjay K. Mandal

E-mail: [sanjaymandal@iisermohali.ac.in](mailto:sanjaymandal@iisermohali.ac.in)

## Table of Contents

|              | <b>Description</b>                                                                                                                                                                                                                                                 | <b>Page No.</b> |
|--------------|--------------------------------------------------------------------------------------------------------------------------------------------------------------------------------------------------------------------------------------------------------------------|-----------------|
|              | Materials and characterization methods, physical measurements, single crystal X-ray data collection and refinements, density functional theory (DFT) calculation.                                                                                                  | S-3 to S-4      |
| Fig. S1      | FTIR spectra and PXRD patterns of <b>5</b> and <b>6</b>                                                                                                                                                                                                            | S-4             |
| Fig. S2-S5   | FTIR spectra of <b>1-4</b>                                                                                                                                                                                                                                         | S-5 to S-6      |
| Fig. S6      | Partially labelled view of the asymmetric unit of <b>2-4</b>                                                                                                                                                                                                       | S-7             |
| Fig. S7      | FTIR spectra of as-synthesized <b>3</b> and its crystals                                                                                                                                                                                                           | S-8             |
| Fig. S8-S9   | Stability of <b>4</b> in water, methanol and under different pH conditions                                                                                                                                                                                         | S-8 to S-9      |
| Fig. S10     | TG profiles of <b>1-4</b>                                                                                                                                                                                                                                          | S-9             |
| Fig. S11     | Elemental mapping highlighting the homogeneous distribution of the component elements in <b>1-4</b>                                                                                                                                                                | S-10            |
| Fig. S12     | Solid-state diffuse reflectance spectra of <b>1-4</b>                                                                                                                                                                                                              | S-10            |
| Fig. S13     | Tauc plot and band gap energy values for <b>1-4</b>                                                                                                                                                                                                                | S-11            |
| Fig. S14     | Emission spectra of homogeneous dispersions of <b>1-4</b> in water                                                                                                                                                                                                 | S-11            |
| Fig. S15-S16 | Fluorescence titration spectra of <b>4</b> in presence of NFT and NFZ                                                                                                                                                                                              | S-12            |
| Fig. S17-S18 | $K_{SV}$ calculations for <b>4</b> toward NFT and NFZ                                                                                                                                                                                                              | S-13            |
| Fig. S19-S21 | $K_{SV}$ calculations for <b>1-3</b> toward NFT                                                                                                                                                                                                                    | S-14 to S-15    |
| Fig. S22     | 3D Stern-Volmer plots                                                                                                                                                                                                                                              | S-15            |
| Fig. S23-S24 | LOD calculations for <b>4</b> in presence of NFT and NFZ                                                                                                                                                                                                           | S-16 to S-17    |
| Fig. S25-S27 | LOD calculations for <b>1-3</b> in presence of NFT                                                                                                                                                                                                                 | S-18 to S-20    |
| Fig. S28     | Emission spectra of <b>4</b> before (0 s) and after (20 s) addition of 75 $\mu$ L of NFT and NFZ                                                                                                                                                                   | S-21            |
| Fig. S29-S30 | Recyclability tests in presence of NFT and NFZ                                                                                                                                                                                                                     | S-22            |
| Fig. S31     | Stability of <b>4</b> before and after soaking in NFT and NFZ solutions for 24 h.                                                                                                                                                                                  | S-23            |
| Fig. S32     | Lifetime decay curves of <b>4</b> before and after the addition of NFT (a) and NFZ (b) in aqueous media                                                                                                                                                            | S-24            |
| Fig. S33     | Plot of average lifetime vs volume of NFT and NFZ, respectively.                                                                                                                                                                                                   | S-25            |
| Fig. S34-S35 | Fluorescence based detection of NFT by <b>5</b> and <b>6</b>                                                                                                                                                                                                       | S-26            |
| Fig. S36     | Interaction of NFT and NFZ with compound <b>4</b> through H-bond                                                                                                                                                                                                   | S-27            |
| Fig. S37     | HOMO–LUMO energy levels of the $H_2(oxdz)$ , NFT and NFZ, and rearranged HOMO-LUMO energy levels of $NFT@H_2(oxdz)$ and $NFZ@H_2(oxdz)$ after electron transfer determined by DFT calculations using B3LYP at the 6-31G (d,p) basis set of the Gaussian 09 program | S-28            |
| Fig. S38     | HOMO–LUMO energy levels of the $H_2(oxdz)$ and different antibiotics determined by DFT calculations using B3LYP at the 6-31G (d,p) basis set of the Gaussian 09 program                                                                                            | S-28            |
| Table S1     | Crystallographic Data and Structure Refinement Parameters for <b>2</b> , <b>3</b> , and <b>4</b>                                                                                                                                                                   | S-29            |
| Tables S2-S3 | Comparison of detection of NFT and NFZ by MOCNs reported in the literature                                                                                                                                                                                         | S-30 to S-31    |
| Table S4     | Average lifetime values of <b>4</b> before and after addition of different volumes of nitrofurans                                                                                                                                                                  | S-31            |
| Table S5     | HOMO and LUMO energies calculation for $H_2(oxdz)$ , antibiotics, $NFT@H_2(oxdz)$ , and $NFZ@H_2(oxdz)$ using B3LYP/6-31G(d,p) level                                                                                                                               | S-32            |
|              | References                                                                                                                                                                                                                                                         | S-32 to S-33    |

**Physical measurements.** FTIR spectra were recorded in the 4000  $\text{cm}^{-1}$  to 400  $\text{cm}^{-1}$  range on a Bruker laser class spectrometer with samples being prepared as KBr pellets. Elemental analysis (C, H, N) was carried out using a Thermo Finnigan analyzer at IIT Bombay. Powder X-ray studies were conducted by using a Rigaku Ultima IV diffractometer. Thermogravimetric analysis (TGA) was carried out using a TA Shimadzu instrument. FESEM experiments were performed on a JEOL instrument; each sample was well dispersed in methanol, drop cast on a silicon wafer, dried and coated with gold using a working distance of 15–22 mm and a voltage of 3–5 kV. High-resolution transmission electron microscopy (HRTEM) was performed on a JEOL JEM-F-200 microscope. For sample preparation, 1 mg of the material was dispersed in 10 mL of methanol and sonicated for 15 min to obtain a homogeneous suspension. A drop of the suspension was then deposited onto a copper grid and allowed to dry under ambient conditions prior to analysis.

**Single crystal X-ray data collection and refinements.** For 2-4, suitable single crystals were chosen and mounted on the goniometer head using a nylon loop of appropriate dimension and mineral oil. Initial crystal evaluation and data collection were performed at room temperature using a fully automated Kappa APEX II diffractometer equipped with a CCD detector and sealed-tube monochromated Mo  $K\alpha$  radiation through APEX2.<sup>[S1]</sup> The program SAINT<sup>[S1]</sup> was used to integrate the data, fitting reflection profiles, and obtaining values of  $F^2$  and  $\sigma(F^2)$  for each reflection. Data were also corrected for Lorentz and polarization effects. The subroutine XPREP<sup>[S1]</sup> was used for the processing of data that included determination of space group, application of an absorption correction (SADABS<sup>[S1]</sup>), merging of data, and generation of files necessary for solution and refinement. The crystal structures were solved by direct methods using the SHELXS program of the SHELXT<sup>[S2]</sup> package and refined using full-matrix least-squares methods with SHELXL-2014. Several full-matrix least-squares/difference Fourier cycles were performed, locating the remainder of the nonhydrogen atoms. In order to improve the R-factors and to address the residual electron density for any disordered solvent molecules, certain reflections with strong disagreement between  $F_o$  and  $F_c$  were omitted and/or the solvent masking option in Olex2 software<sup>[S3]</sup> was applied, whenever appropriate and necessary (for 3 and 4). Hydrogen atoms except for those of lattice water molecule(s) for all structures were added at the calculated positions. All figures were drawn using OLEX2,<sup>[S3]</sup> Mercury V 3.10.2,<sup>[S4]</sup> and DIAMOND V 3.2.<sup>[S5]</sup>

**Density functional theory (DFT) calculation.** Using the Gaussian 09 suite of packages, calculations were performed. For the optimization of the structure, hybrid functional, Becke's three-parameter exchange, and the Lee–Yang–Parr correlation functional (B3LYP) at a split valence basis set 6-31G(d,p) were used.<sup>[S6]</sup>

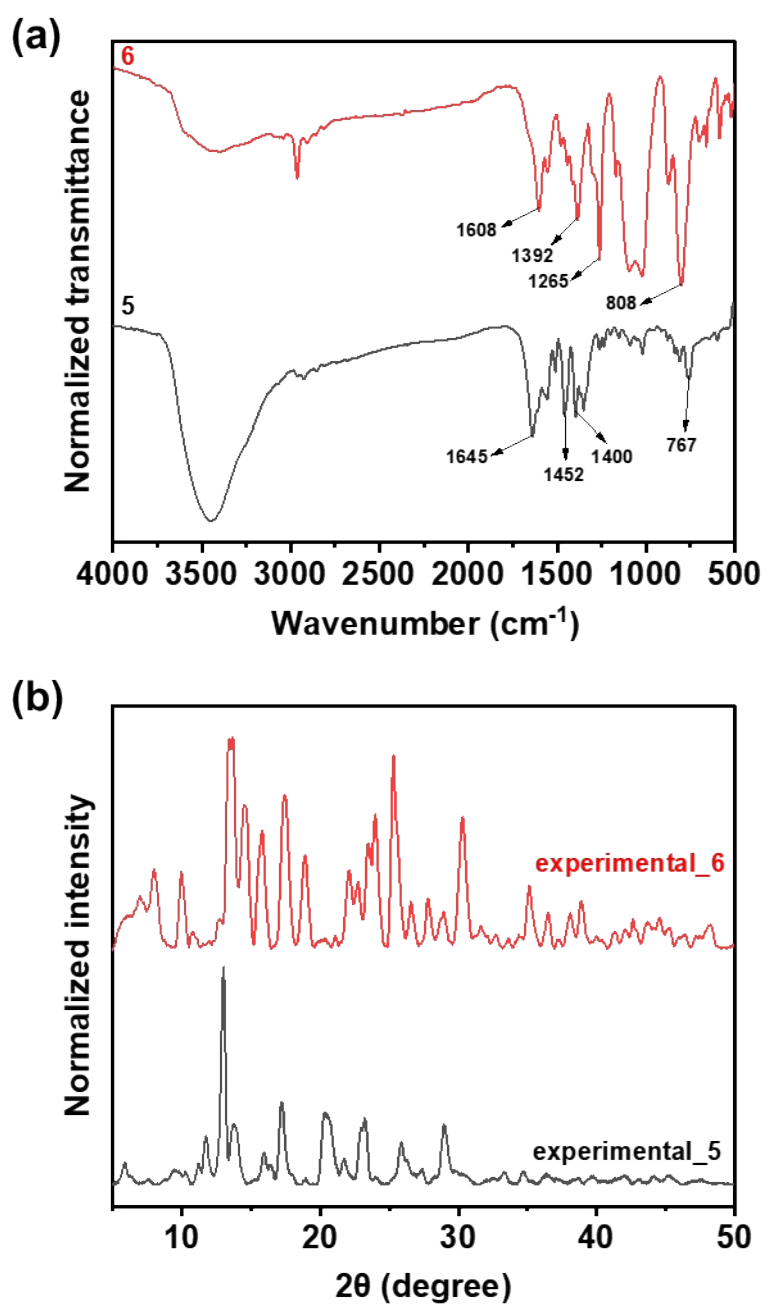

**Fig. S1** FTIR spectra and PXRD patterns of **5** and **6**. These spectra and diffractograms match exactly with the ones reported earlier in References.

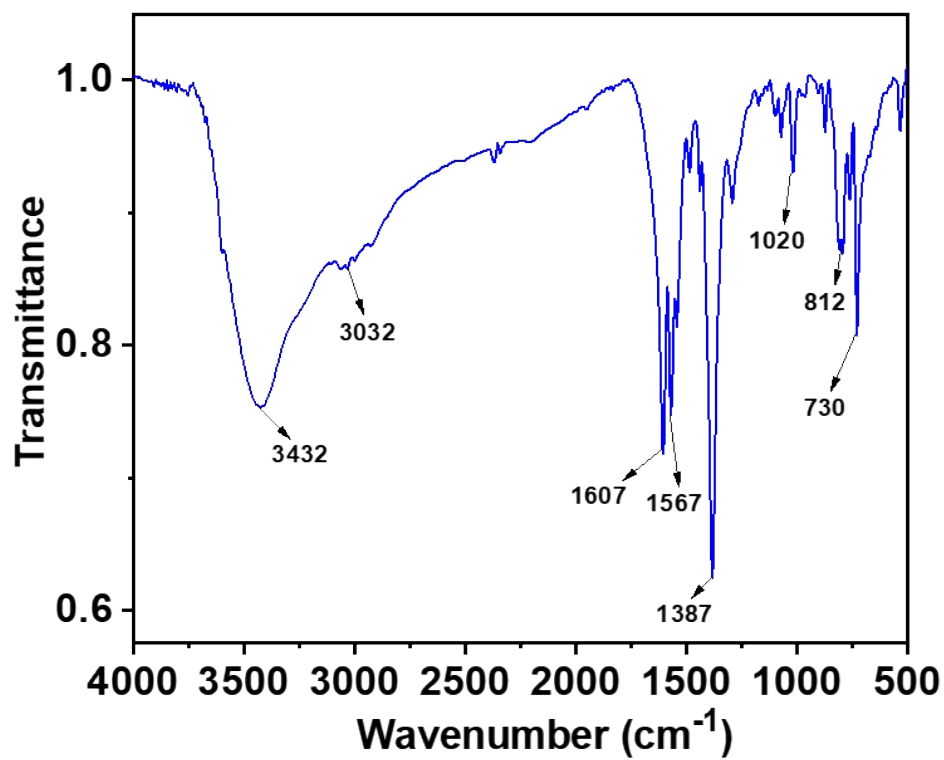

Fig. S2 FTIR spectrum of 1.

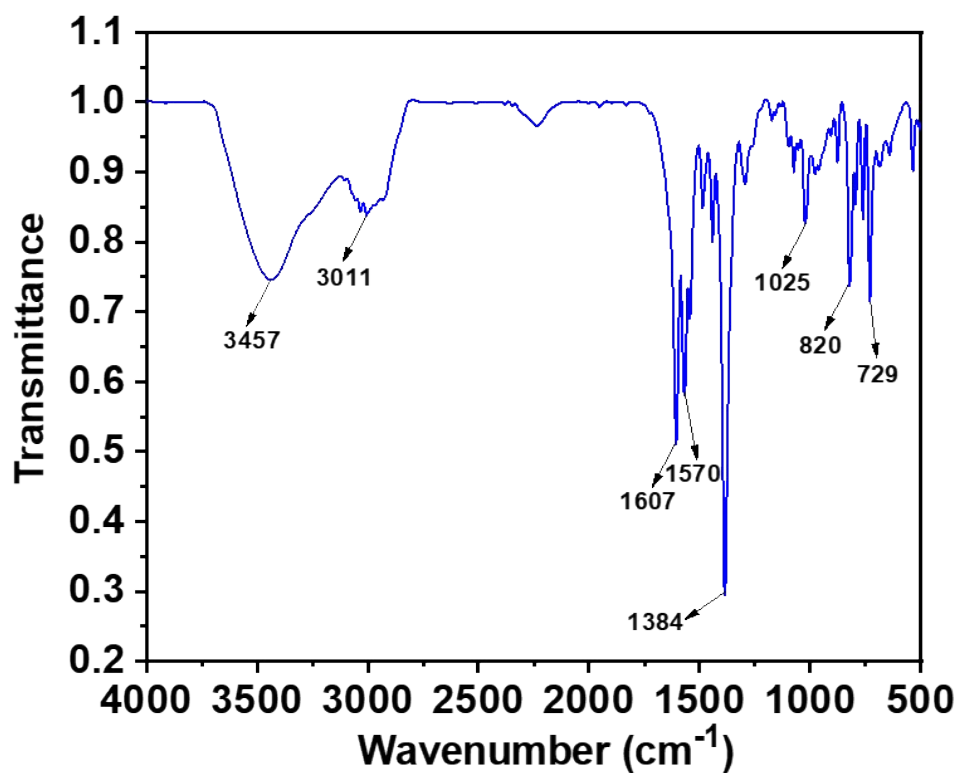

Fig. S3 FTIR spectrum of 2.

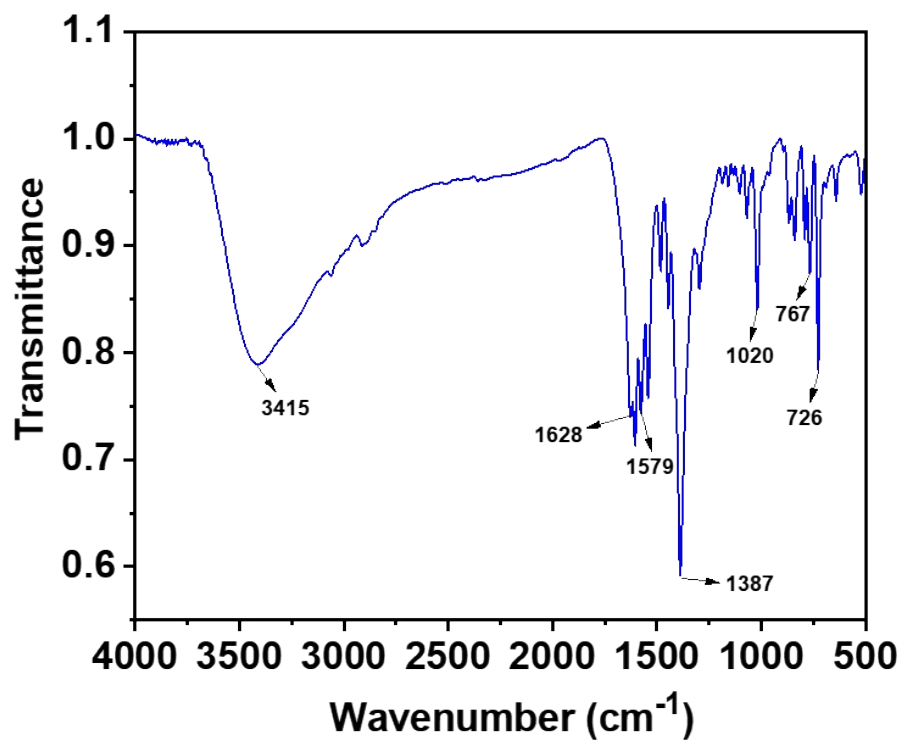

Fig. S4 FTIR spectrum of 3.

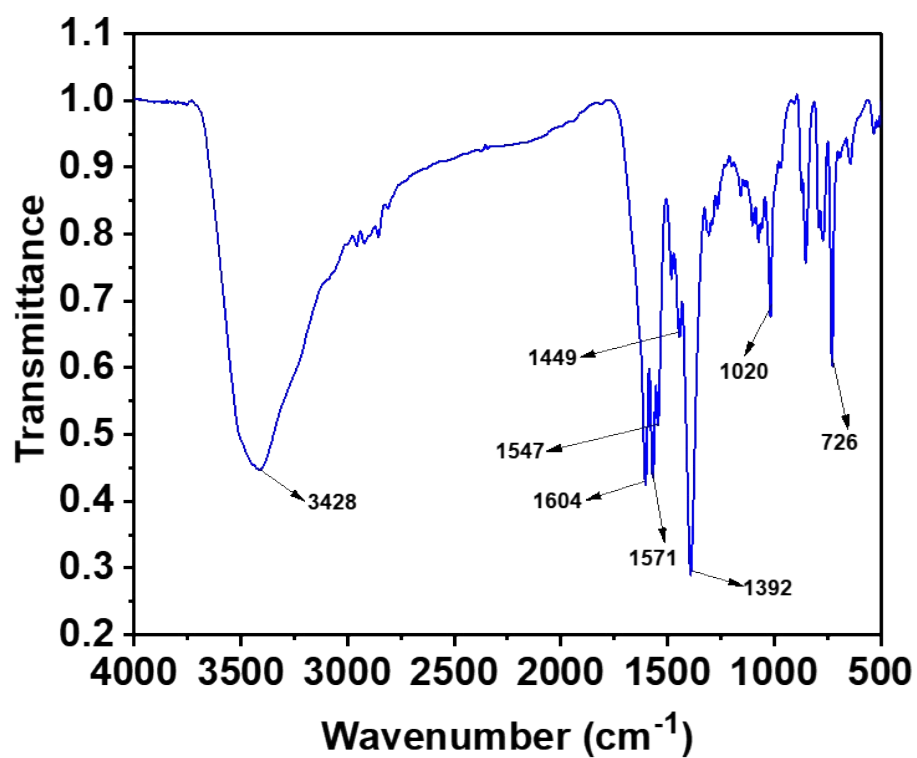

Fig. S5 FTIR spectrum of 4.

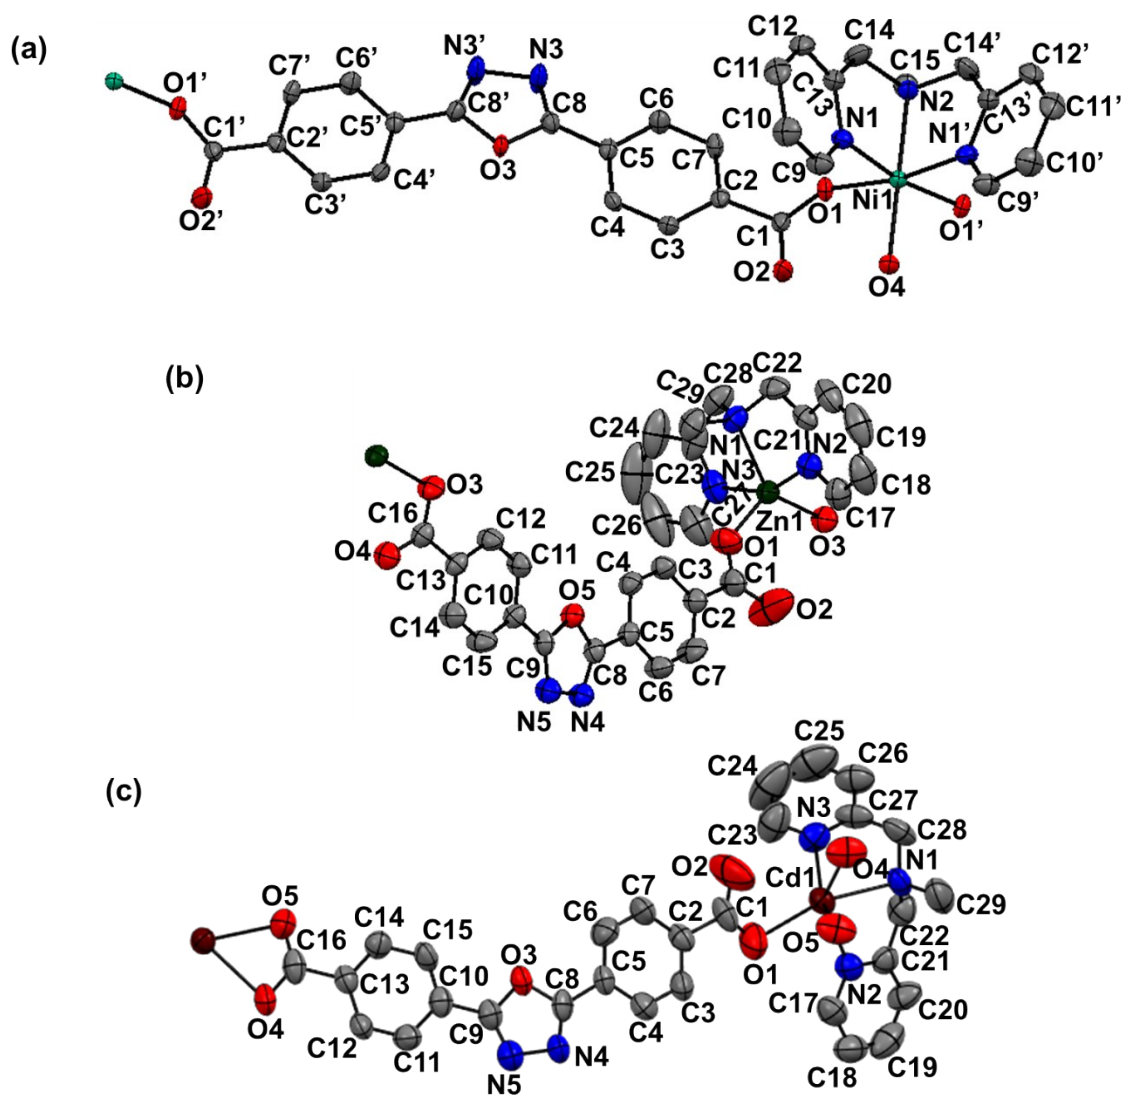

**Fig. S6** (a-c) Fully labelled view of the repeat units of the polymeric structures, 2-4, respectively. Non-hydrogen atoms are depicted as ellipsoids with 50% probability. Hydrogen atoms are not shown for clarity.

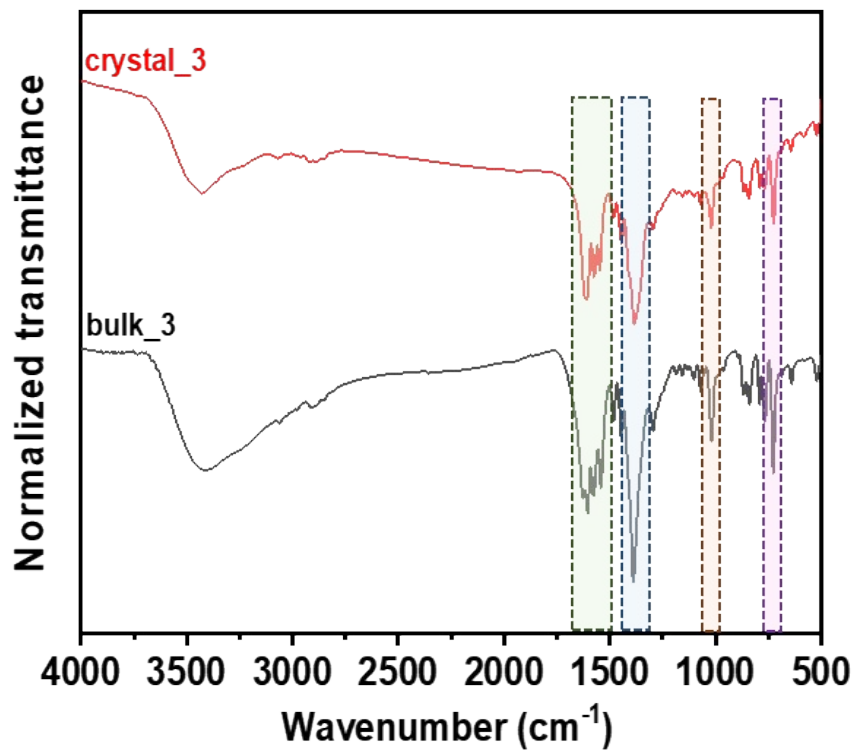

Fig. S7 FTIR spectra of as-synthesized **3** and its crystals.

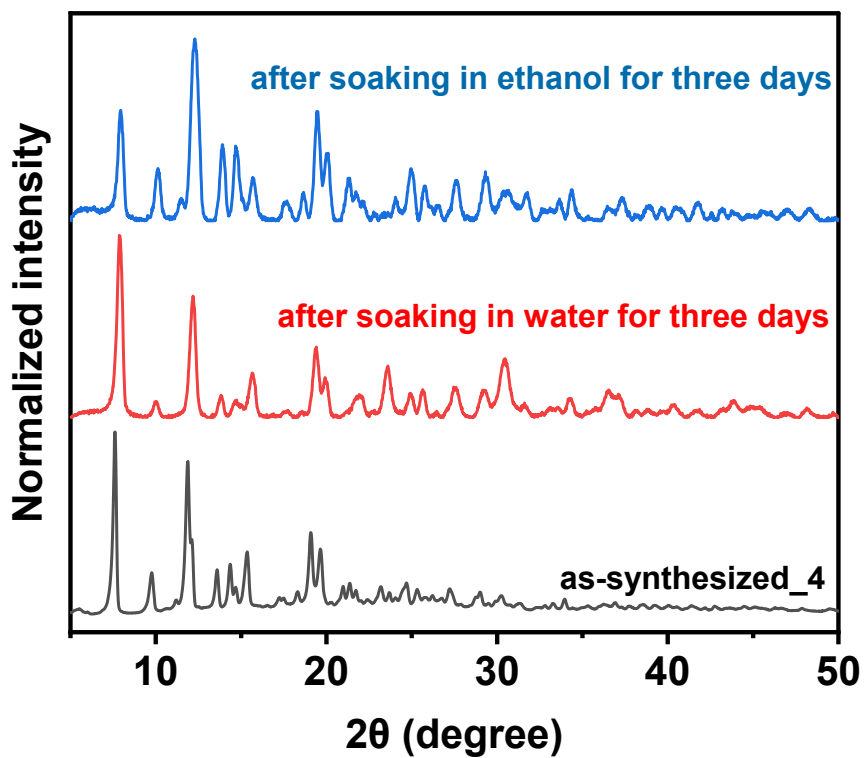

Fig. S8 Stability of **4** in water and ethanol.

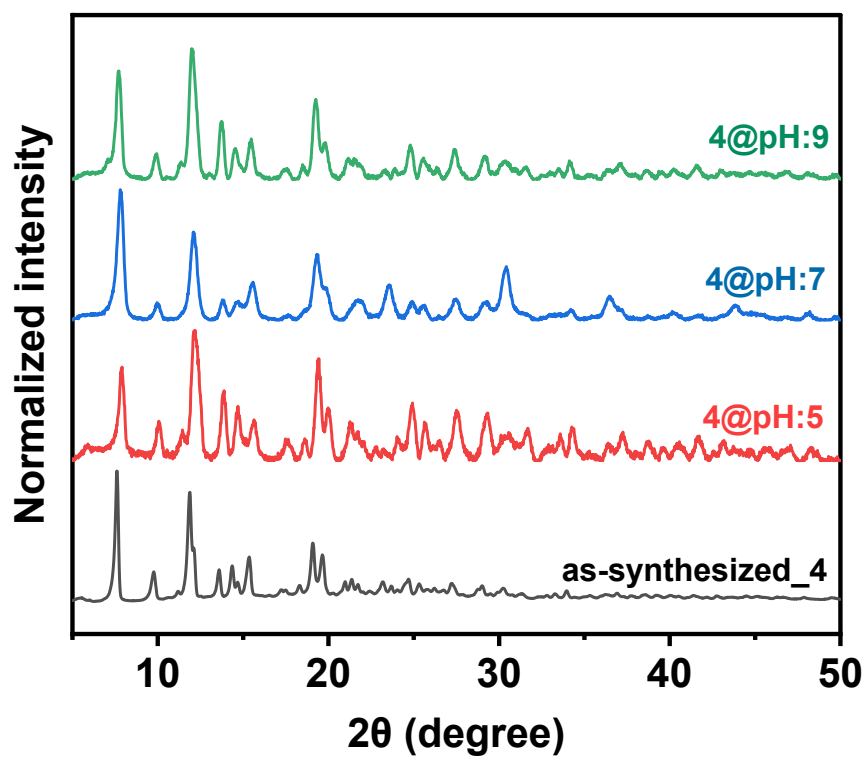

Fig. S9 Stability of 4 under different pH conditions.

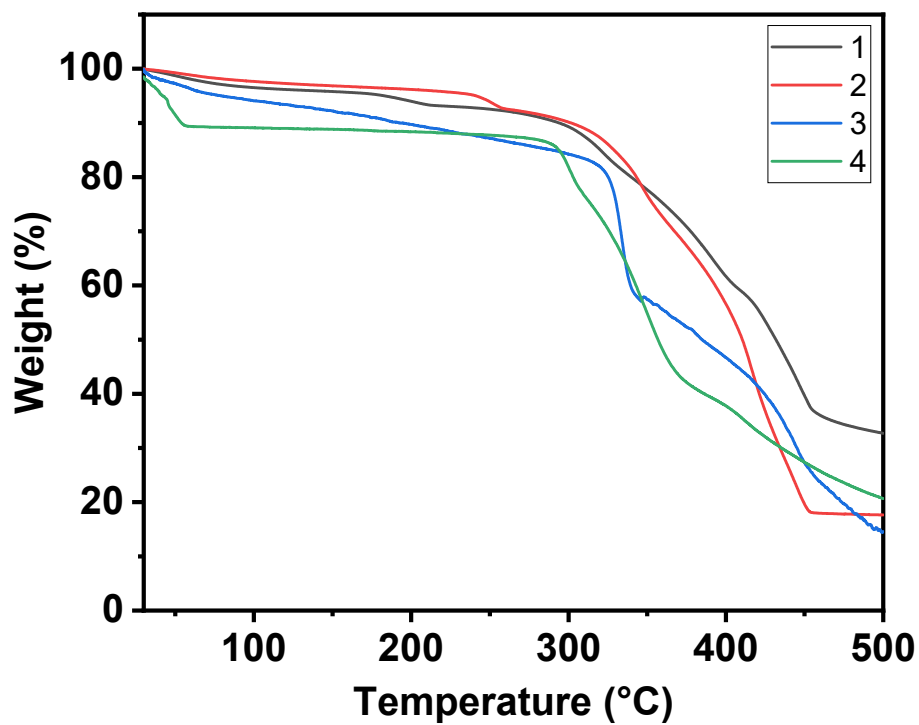

Fig. S10 TG profiles of 1-4.

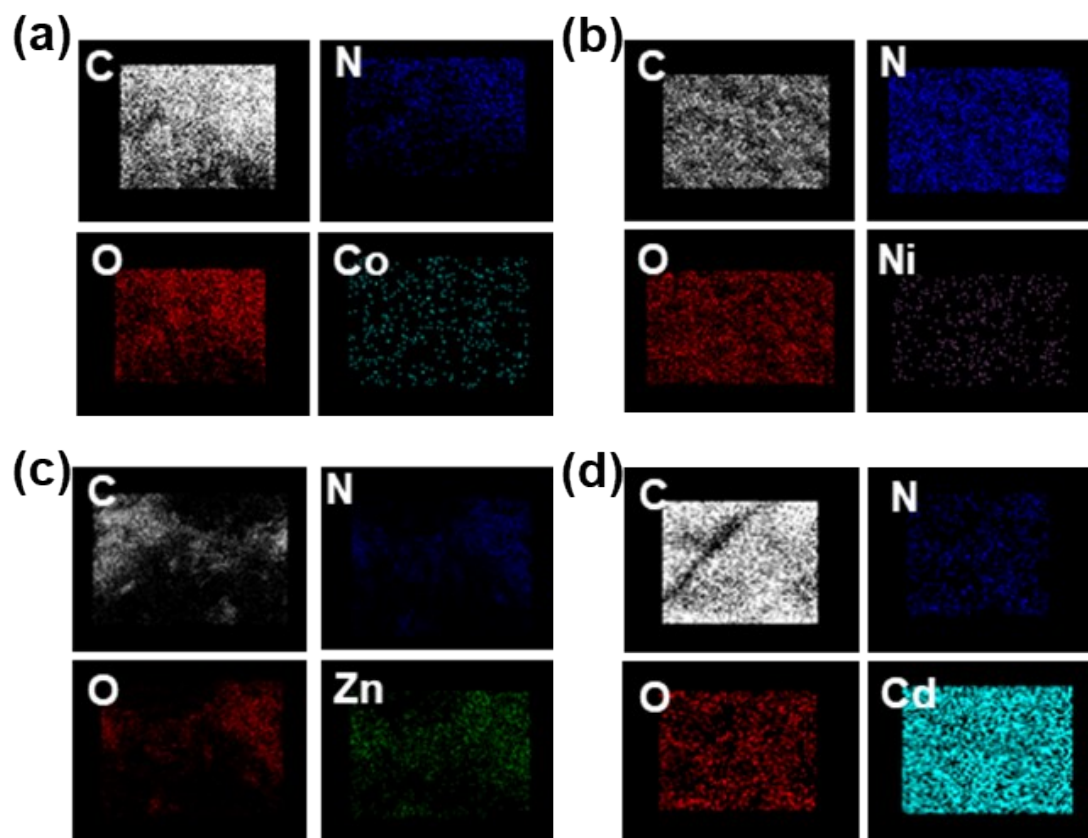

**Fig. S11** (a-d) Elemental mapping highlighting the homogeneous distribution of the component elements in 1-4, respectively.

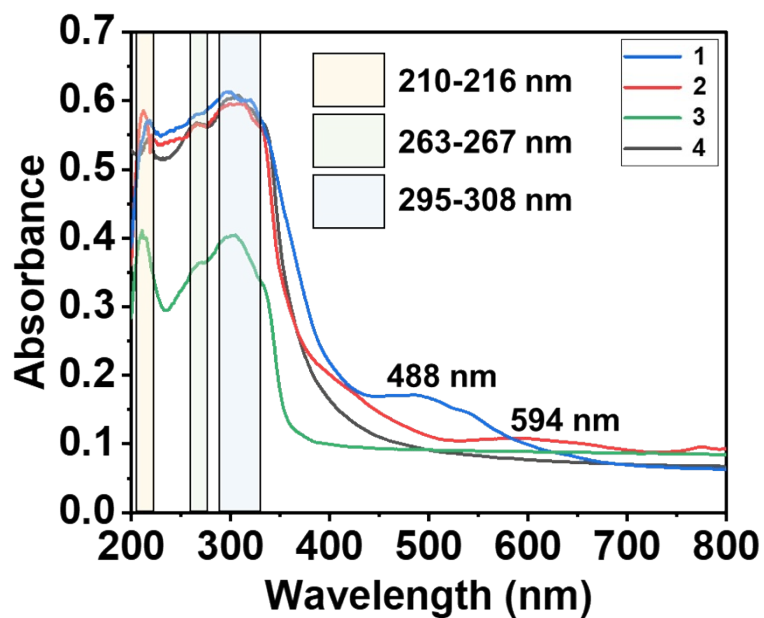

**Fig. S12** Solid-state diffuse reflectance spectra of 1-4.

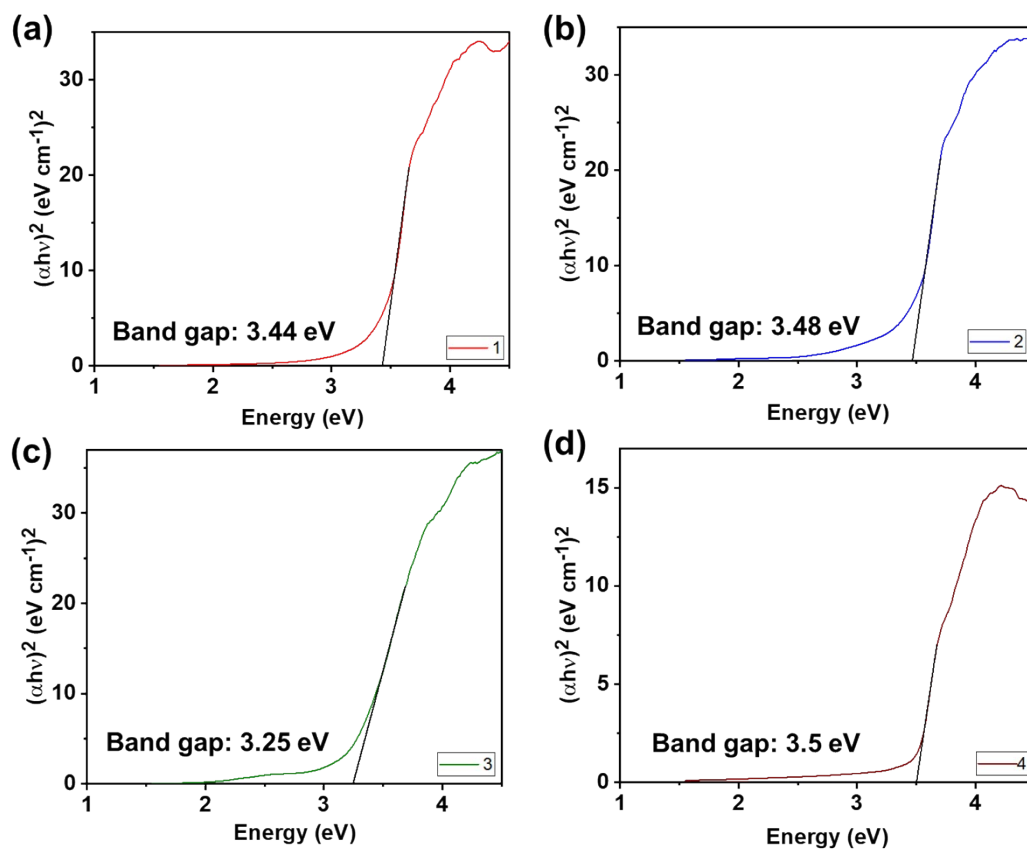

Fig. S13 (a-d) Tauc plot and band gap energy value for 1-4, respectively.

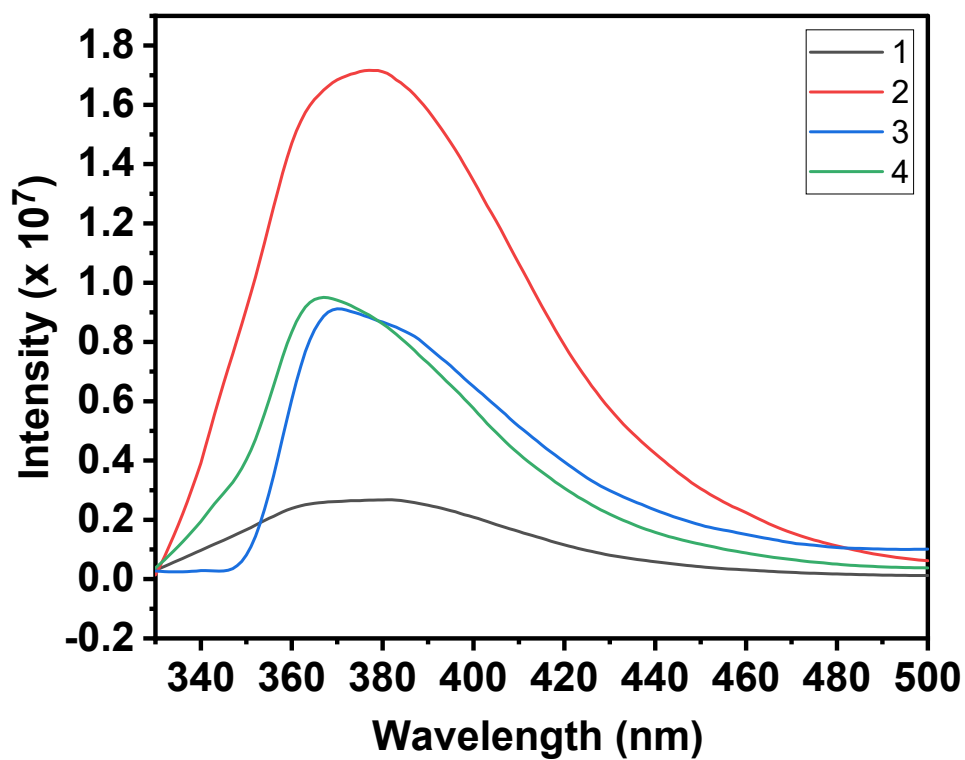

Fig. S14 Emission spectra of homogeneous suspensions of 1-4 in water.

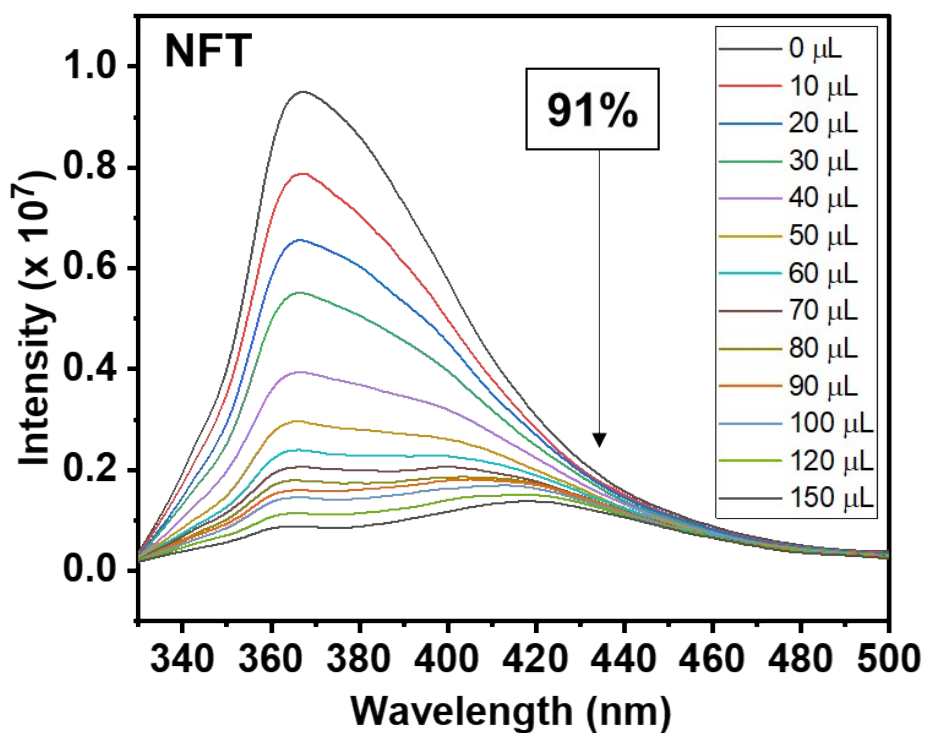

**Fig. S15** Emission spectra of **4** dispersed in aqueous solution upon incremental addition of NFT solution (1 mM).

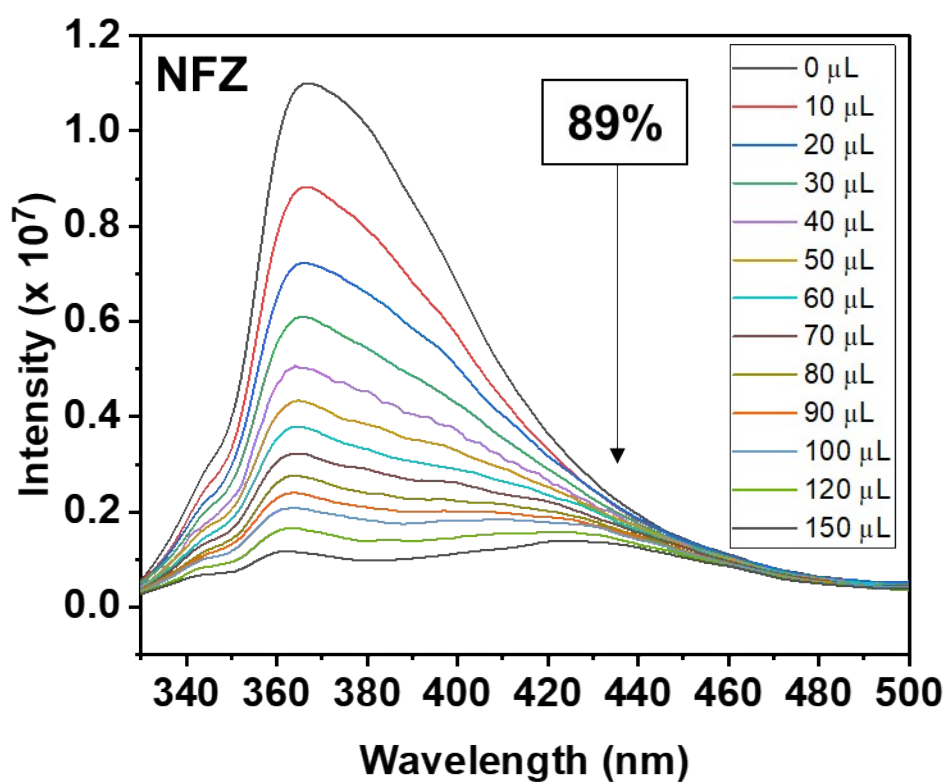

**Fig. S16** Emission spectra of **4** dispersed in aqueous solution upon incremental addition of NFZ solution (1 mM).

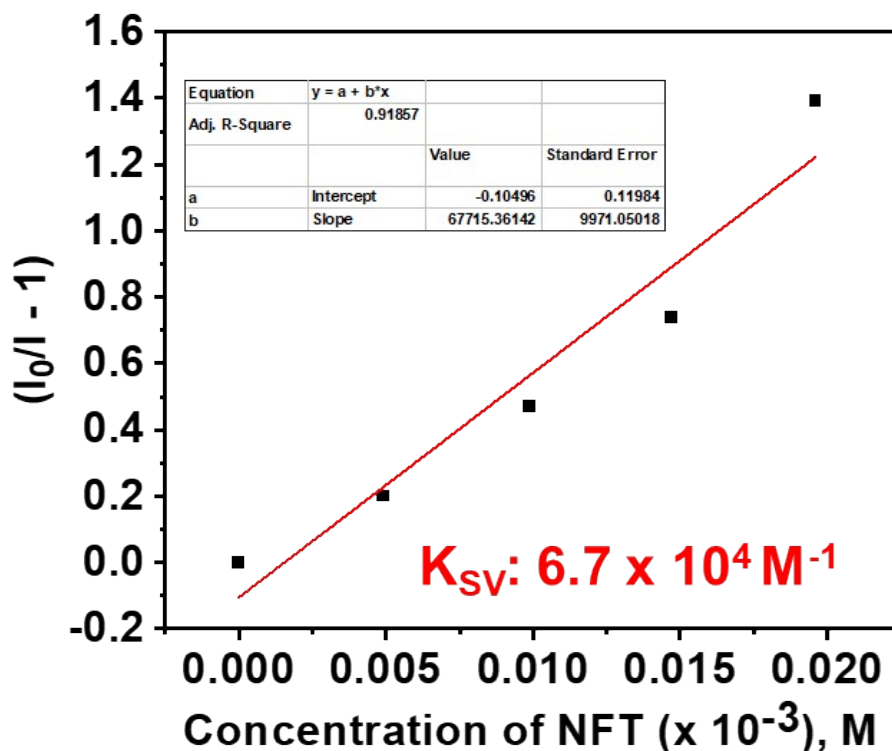

**Fig. S17** Stern-Volmer (SV) plot for NFT of 4. The relative fluorescence intensity is linear with NFT concentration in the range of 0-20  $\mu\text{M}$ ,  $I_0/I = 1 + 67715.36 ([\text{NFT}])$  ( $R^2 = 0.91857$ ).

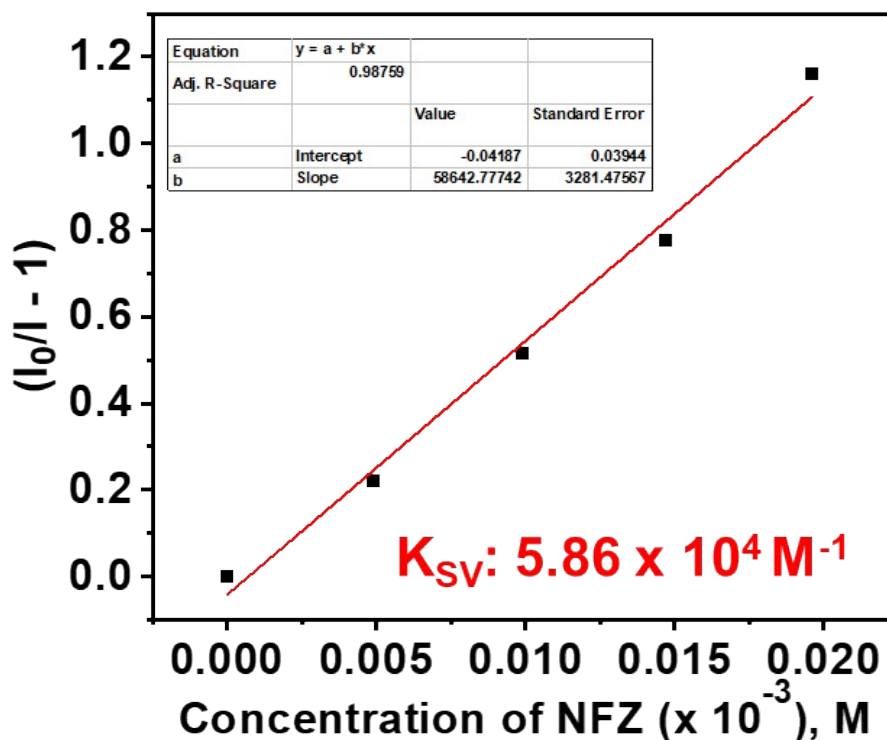

**Fig. S18** Stern-Volmer (SV) plot for NFZ of 4. The relative fluorescence intensity is linear with NFZ concentration in the range of 0-20  $\mu\text{M}$ ,  $I_0/I = 1 + 58642.77 ([\text{NFZ}])$  ( $R^2 = 0.98759$ ).

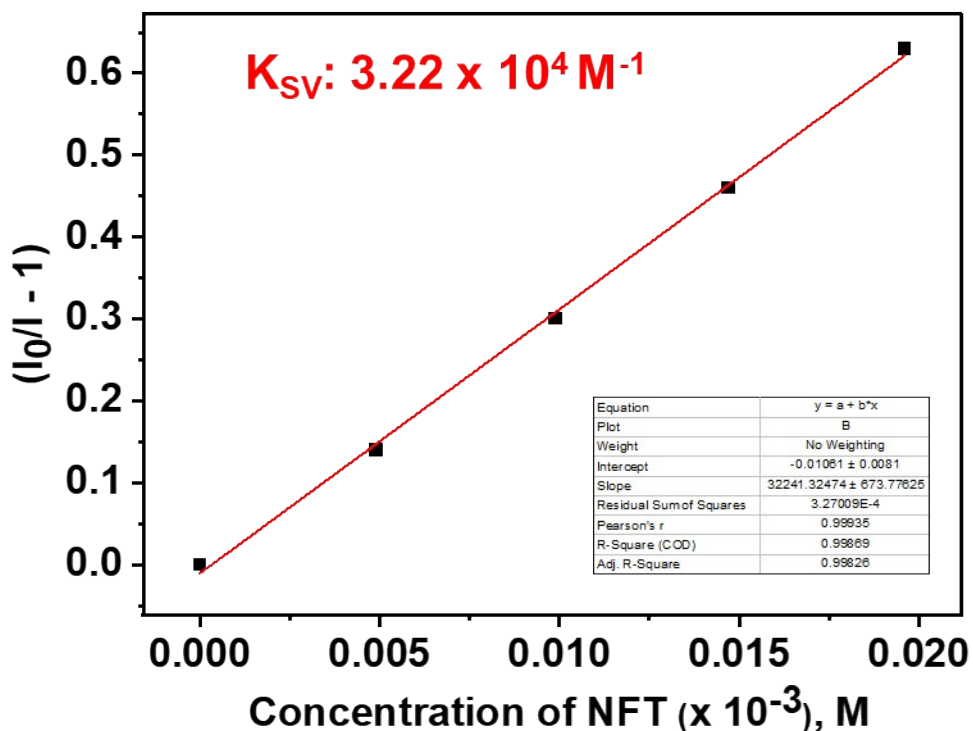

**Fig. S19** Stern-Volmer (SV) plot for NFT of 1. The relative fluorescence intensity is linear with NFT concentration in the range of 0-20  $\mu\text{M}$ ,  $I_0/I = 1 + 32241.32 ([\text{NFT}])$  ( $R^2 = 0.99826$ ).

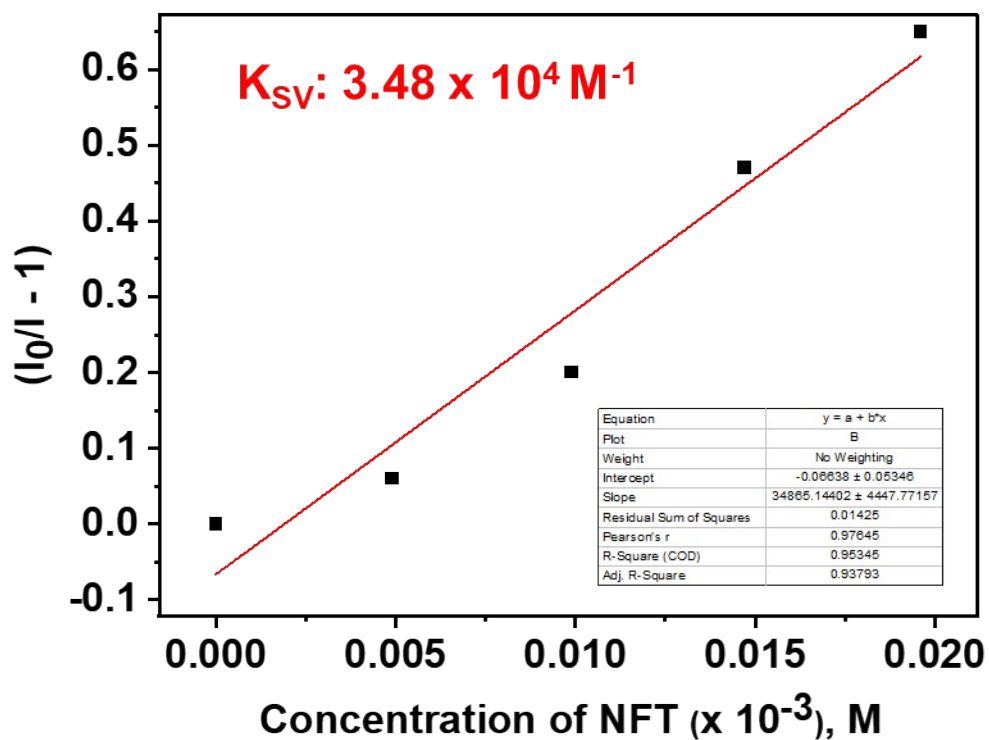

**Fig. S20** Stern-Volmer (SV) plot for NFT of 2. The relative fluorescence intensity is linear with NFT concentration in the range of 0-20  $\mu\text{M}$ ,  $I_0/I = 1 + 34865.144 ([\text{NFT}])$  ( $R^2 = 0.93793$ ).

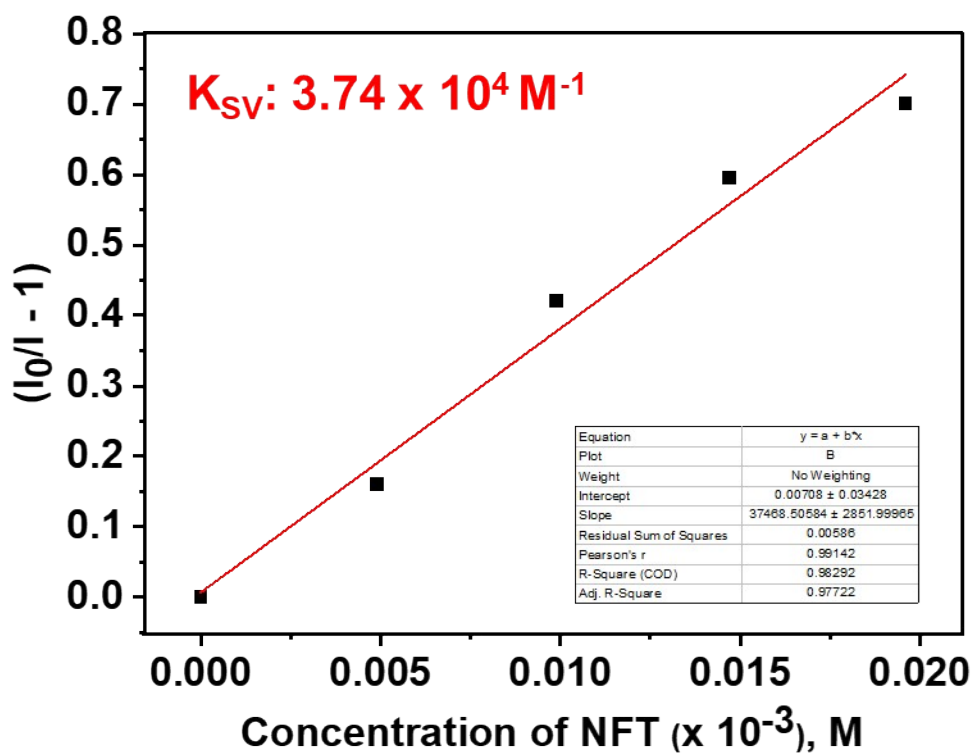

**Fig. S21** Stern-Volmer (SV) plot for NFT of **3**. The relative fluorescence intensity is linear with NFT concentration in the range of 0-20  $\mu\text{M}$ ,  $I_0/I = 1 + 37468.5 ([\text{NFT}])$  ( $R^2 = 0.97722$ ).

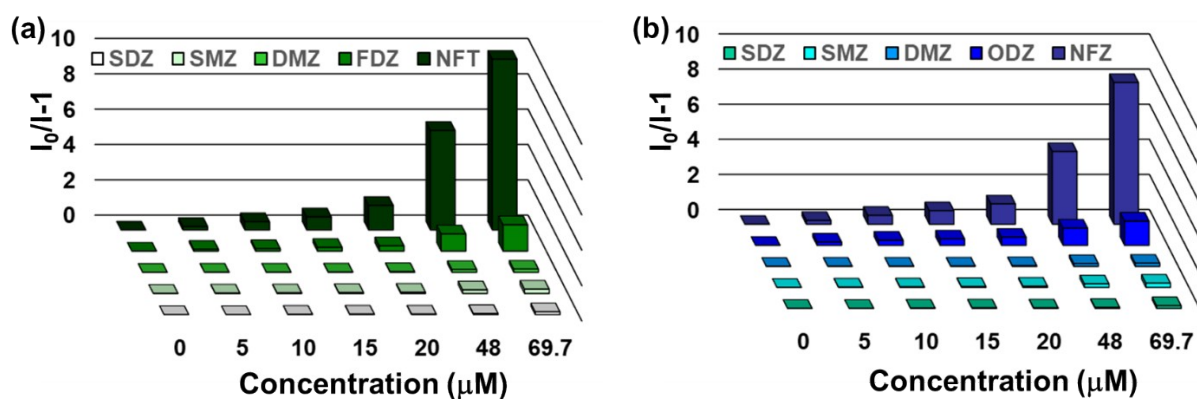

**Fig. S22** 3D Stern-Volmer plot of **1** dispersed in water in presence of different antibiotics.

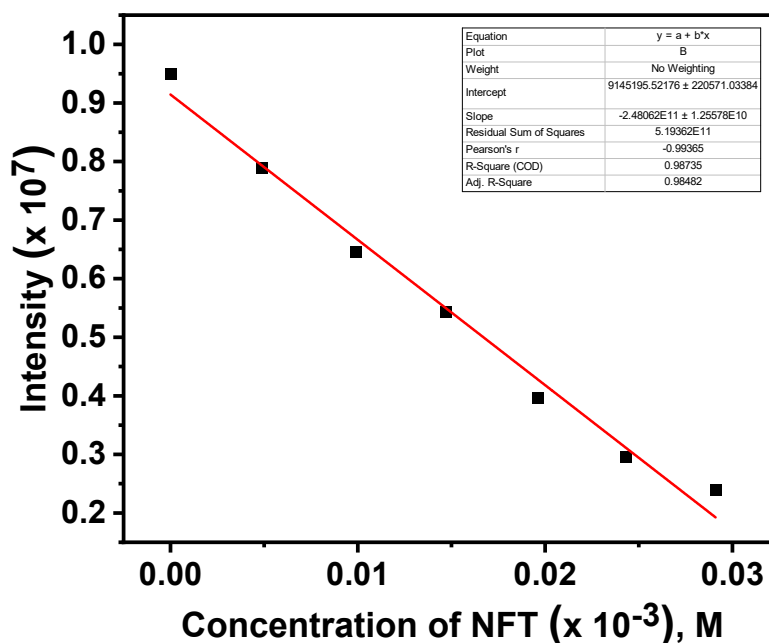

**Fig. S23** Linear region of fluorescence intensity of **4** upon incremental addition of NFT (1 mM stock solution) at  $\lambda_{em} = 362$  nm (upon  $\lambda_{exc} = 310$  nm) ( $R^2 = 0.98482$ ).

#### Calculation of Standard Deviation of **4**:

| Blank Readings                  | Fl Intensity         |
|---------------------------------|----------------------|
| Reading 1                       | $9.64 \times 10^6$   |
| Reading 2                       | $9.53 \times 10^6$   |
| Reading 3                       | $9.51 \times 10^6$   |
| Reading 4                       | $9.46 \times 10^6$   |
| Reading 5                       | $9.49 \times 10^6$   |
| Standard Deviation ( $\sigma$ ) | $6.8775 \times 10^4$ |

#### Determination of Detection Limit of **4** in presence of NFT:

Detection limit was calculated using the following equation:

$$\text{Detection limit} = 3\sigma/m$$

Where ' $\sigma$ ' is the calculated standard deviation from five blank measurements and ' $m$ ' is the slope obtained from the plot of fluorescence emission with increasing concentration of NFT.

Detection Limit: 197 ppb or  $0.831 \mu\text{mol/L}$

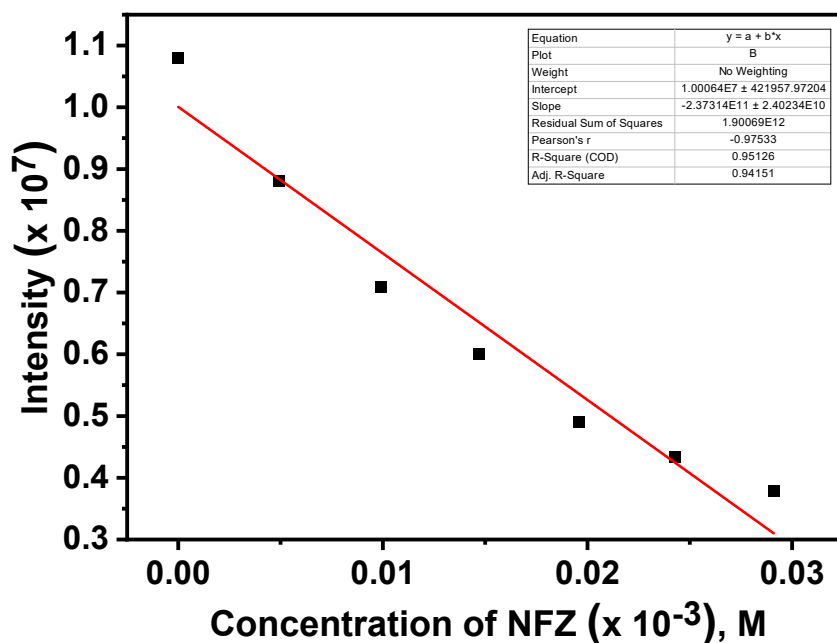

**Fig. S24** Linear region of fluorescence intensity of 4 upon incremental addition of NFZ (1 mM stock solution) at  $\lambda_{em} = 362$  nm (upon  $\lambda_{exc} = 310$  nm) ( $R^2 = 0.94151$ ).

Calculation of Standard Deviation of 4:

| Blank Readings                  | Fl Intensity         |
|---------------------------------|----------------------|
| Reading 1                       | $9.64 \times 10^6$   |
| Reading 2                       | $9.53 \times 10^6$   |
| Reading 3                       | $9.51 \times 10^6$   |
| Reading 4                       | $9.46 \times 10^6$   |
| Reading 5                       | $9.49 \times 10^6$   |
| Standard Deviation ( $\sigma$ ) | $6.8775 \times 10^4$ |

#### Determination of Detection Limit of 4 in presence of NFZ:

Detection limit was calculated using the following equation:

$$\text{Detection limit} = 3\sigma/m$$

Where ' $\sigma$ ' is the calculated standard deviation from five blank measurements and ' $m$ ' is the slope obtained from the plot of fluorescence emission with increasing concentration of NFZ.

Detection Limit: 172 ppb or  $0.869 \mu\text{mol/L}$

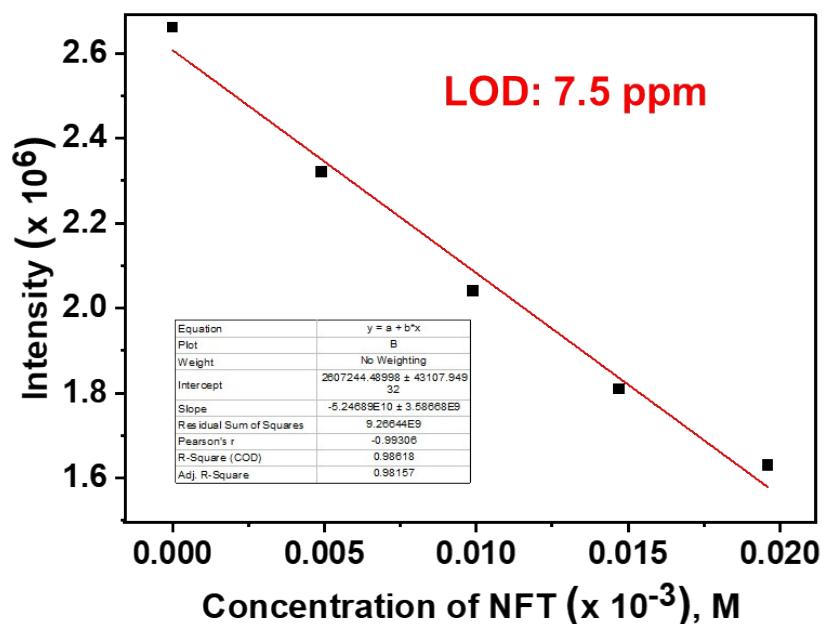

**Fig. S25** Linear region of fluorescence intensity of **1** upon incremental addition of NFT (1 mM stock solution) at  $\lambda_{em} = 380$  nm (upon  $\lambda_{exc} = 310$  nm) ( $R^2 = 0.98157$ ).

**Calculation of Standard Deviation of 1:**

| Blank Readings                  | Fl Intensity           |
|---------------------------------|------------------------|
| Reading 1                       | 1.9 x 10 <sup>6</sup>  |
| Reading 2                       | 2.01 x 10 <sup>6</sup> |
| Reading 3                       | 3.11 x 10 <sup>6</sup> |
| Reading 4                       | 2.99 x 10 <sup>6</sup> |
| Reading 5                       | 2.66 x 10 <sup>6</sup> |
| Standard Deviation ( $\sigma$ ) | 5.55 x 10 <sup>5</sup> |

**Determination of Detection Limit of 1 in presence of NFT:**

Detection limit was calculated using the following equation:

$$\text{Detection limit} = 3\sigma/m$$

Where ‘ $\sigma$ ’ is the calculated standard deviation from five blank measurements and ‘ $m$ ’ is the slope obtained from the plot of fluorescence emission with increasing concentration of NFT.

Detection Limit: 7.5 ppm or 31.7  $\mu\text{mol/L}$

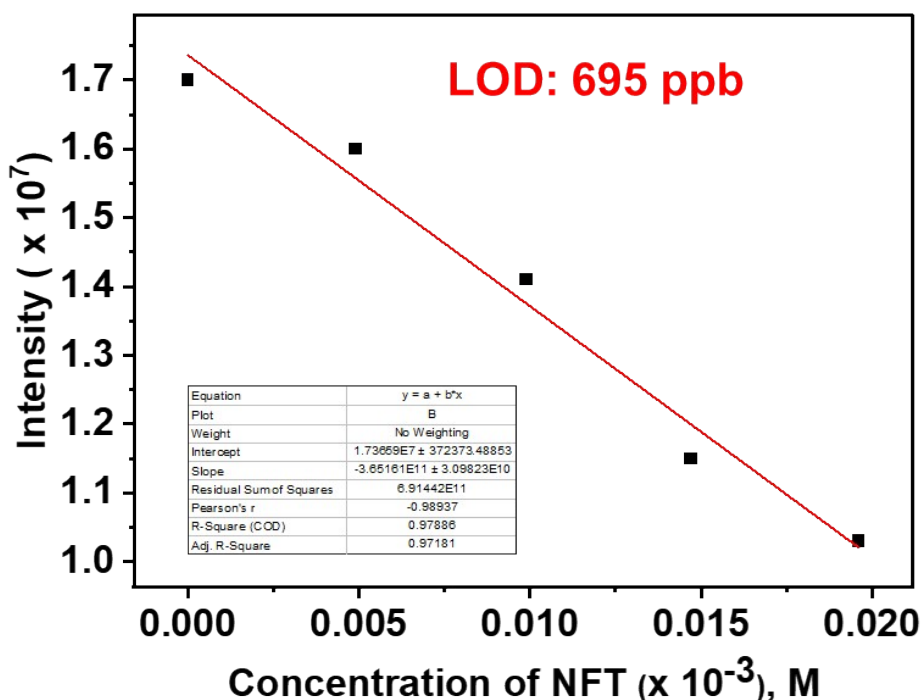

**Fig. S26** Linear region of fluorescence intensity of **2** upon incremental addition of NFT (1 mM stock solution) at  $\lambda_{em} = 377$  nm (upon  $\lambda_{exc} = 310$  nm) ( $R^2 = 0.97181$ ).

**Calculation of Standard Deviation of 2:**

| Blank Readings                                  | Fl Intensity       |
|-------------------------------------------------|--------------------|
| Reading 1                                       | $1.79 \times 10^7$ |
| Reading 2                                       | $1.7 \times 10^7$  |
| Reading 3                                       | $1.72 \times 10^7$ |
| Reading 4                                       | $1.71 \times 10^7$ |
| Reading 5                                       | $1.72 \times 10^7$ |
| <b>Standard Deviation (<math>\sigma</math>)</b> | $3.56 \times 10^5$ |

**Determination of Detection Limit of 2 in presence of NFT:**

Detection limit was calculated using the following equation:

$$\text{Detection limit} = 3\sigma/m$$

Where ‘ $\sigma$ ’ is the calculated standard deviation from five blank measurements and ‘ $m$ ’ is the slope obtained from the plot of fluorescence emission with increasing concentration of NFT.

Detection Limit: 695 ppb or  $2.92 \mu\text{mol/L}$

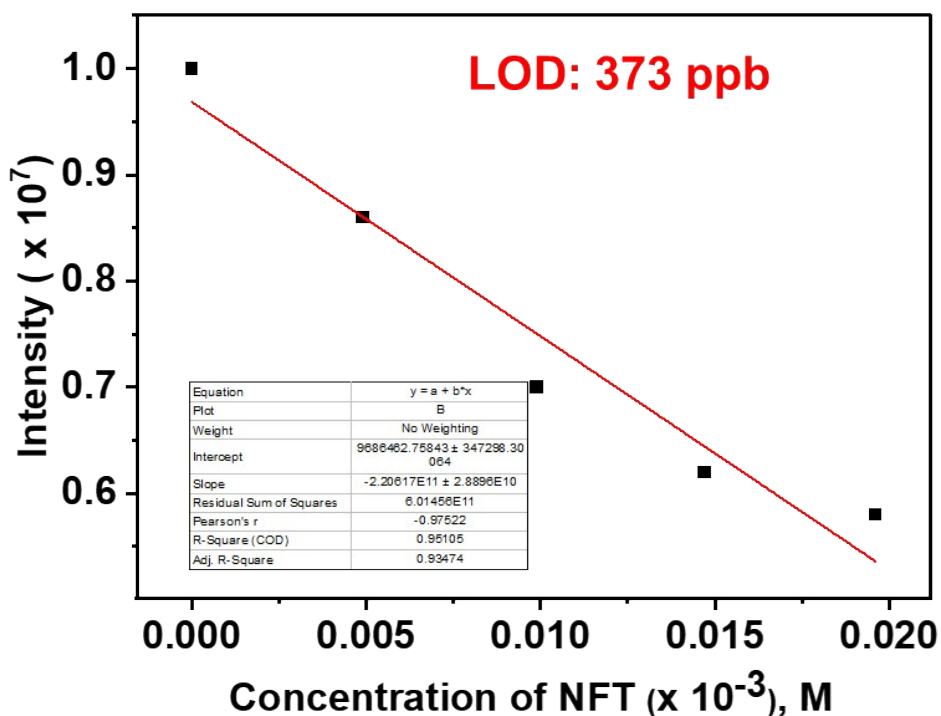

**Fig. S27** Linear region of fluorescence intensity of **3** upon incremental addition of NFT (1 mM stock solution) at  $\lambda_{em} = 370$  nm (upon  $\lambda_{exc} = 310$  nm) ( $R^2 = 0.93474$ ).

**Calculation of Standard Deviation of 3:**

| Blank Readings                                  | Fl Intensity       |
|-------------------------------------------------|--------------------|
| Reading 1                                       | $1.00 \times 10^7$ |
| Reading 2                                       | $0.98 \times 10^7$ |
| Reading 3                                       | $0.97 \times 10^7$ |
| Reading 4                                       | $0.99 \times 10^7$ |
| Reading 5                                       | $0.99 \times 10^7$ |
| <b>Standard Deviation (<math>\sigma</math>)</b> | $1.16 \times 10^5$ |

**Determination of Detection Limit of 3 in presence of NFT:**

Detection limit was calculated using the following equation:

$$\text{Detection limit} = 3\sigma/m$$

Where ‘ $\sigma$ ’ is the calculated standard deviation from five blank measurements and ‘ $m$ ’ is the slope obtained from the plot of fluorescence emission with increasing concentration of NFT.

Detection Limit: 373 ppb or  $1.57 \mu\text{mol/L}$

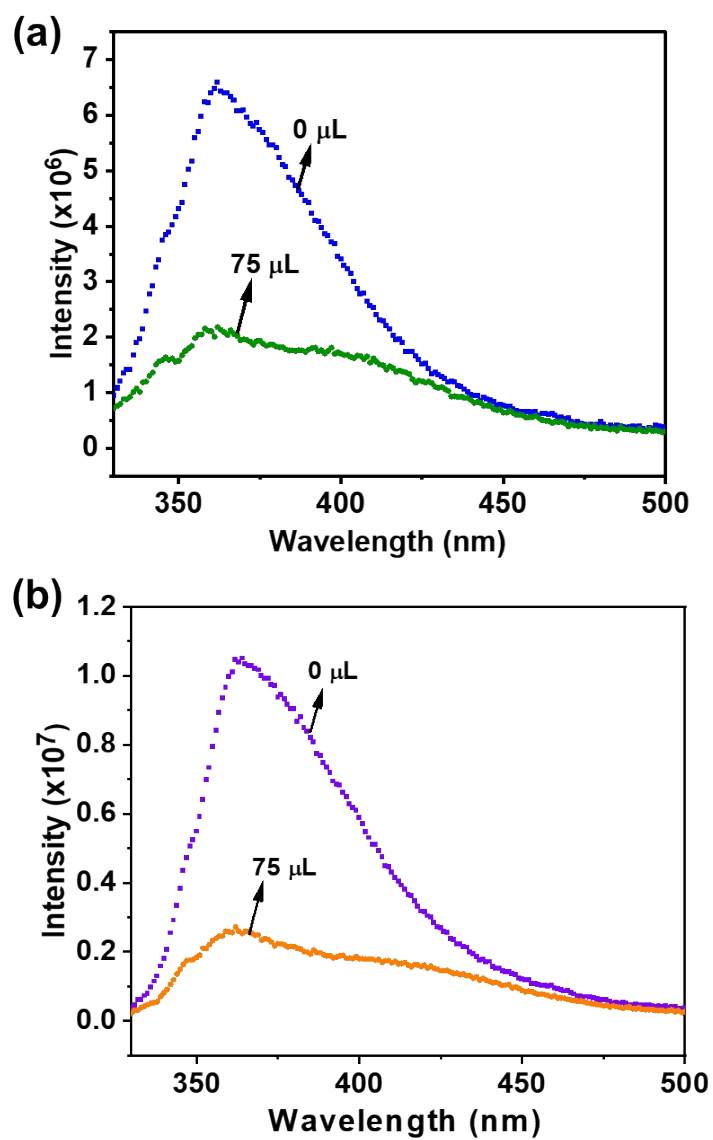

**Fig. S28** Emission spectra of **4** before (0 s) and after (20 s) addition of 75  $\mu\text{L}$  of NFT (a) and NFZ (b).

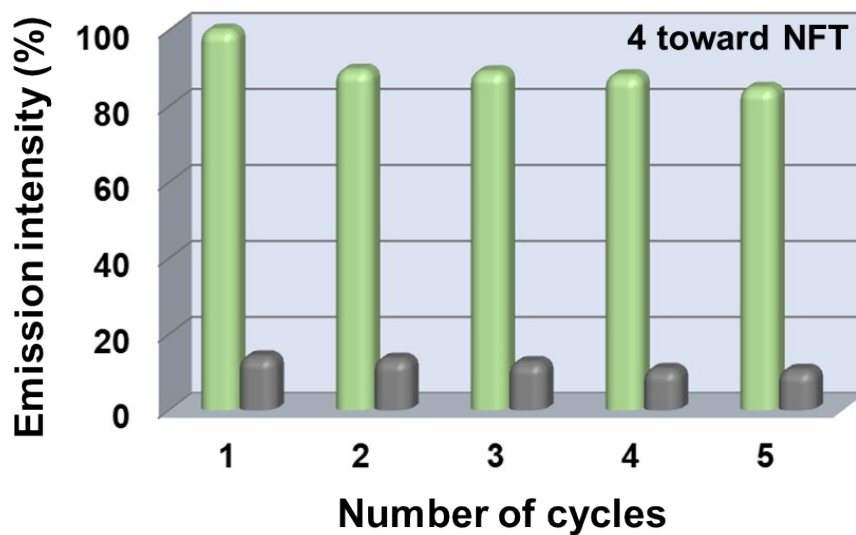

Fig. S29 Recyclability tests for 4 in presence of NFT.

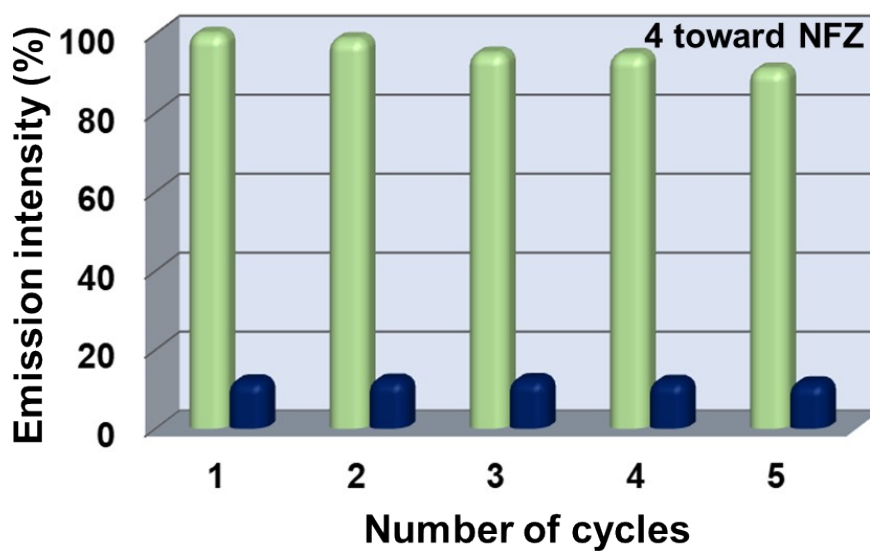

Fig. S30 Recyclability tests for 4 in presence of NFZ.

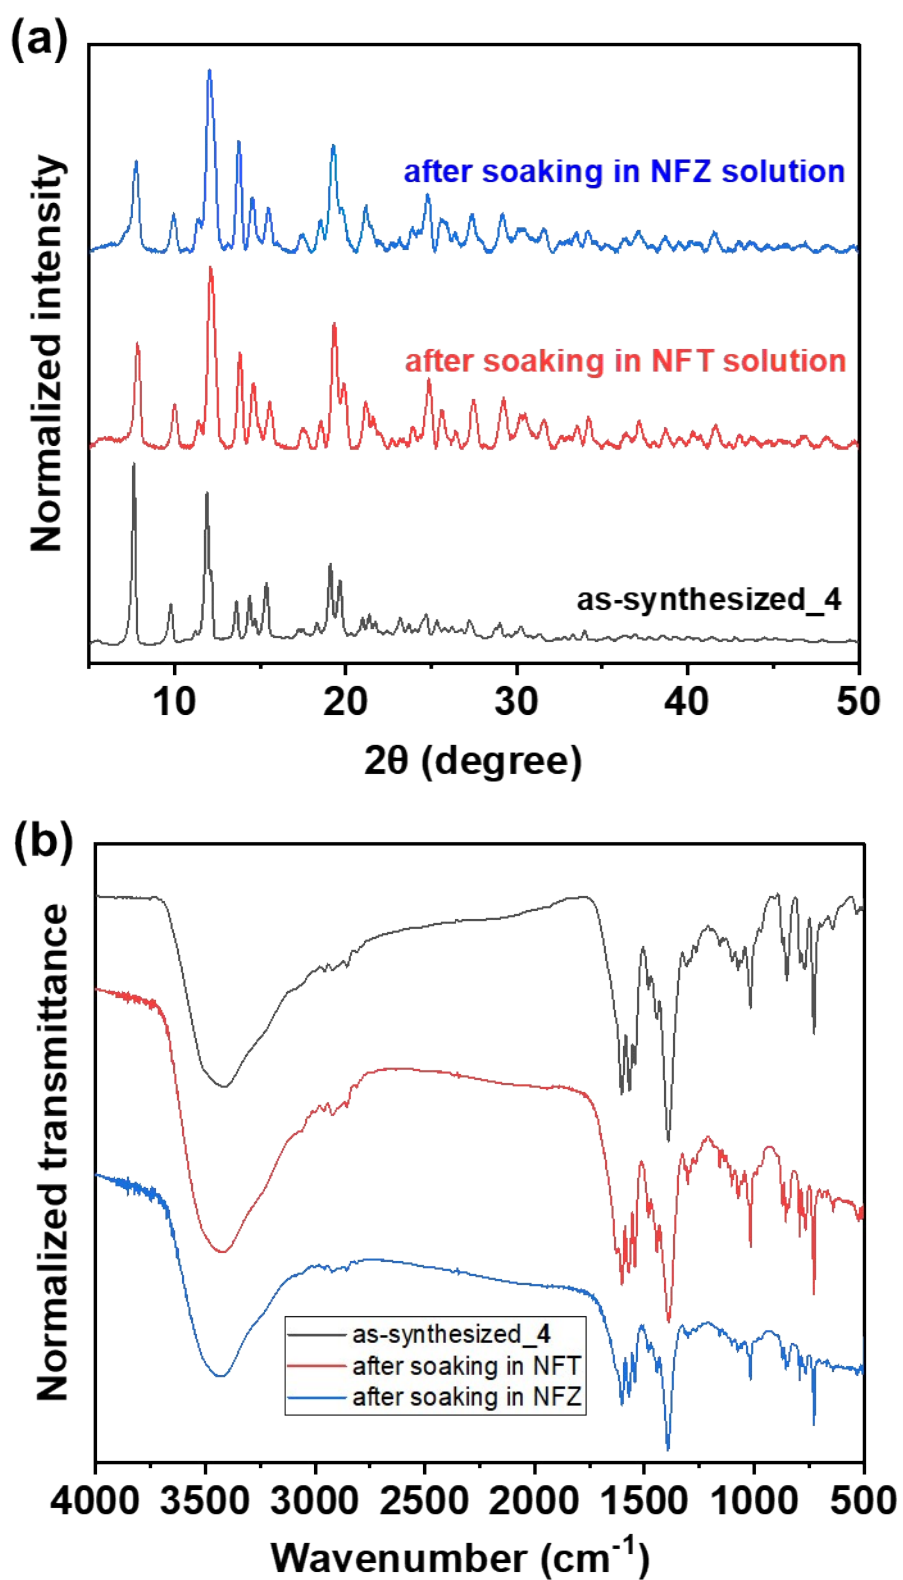

Fig. S31 (a-b) Stability of 4 before and after soaking in NFT and NFZ solutions for 24 h.

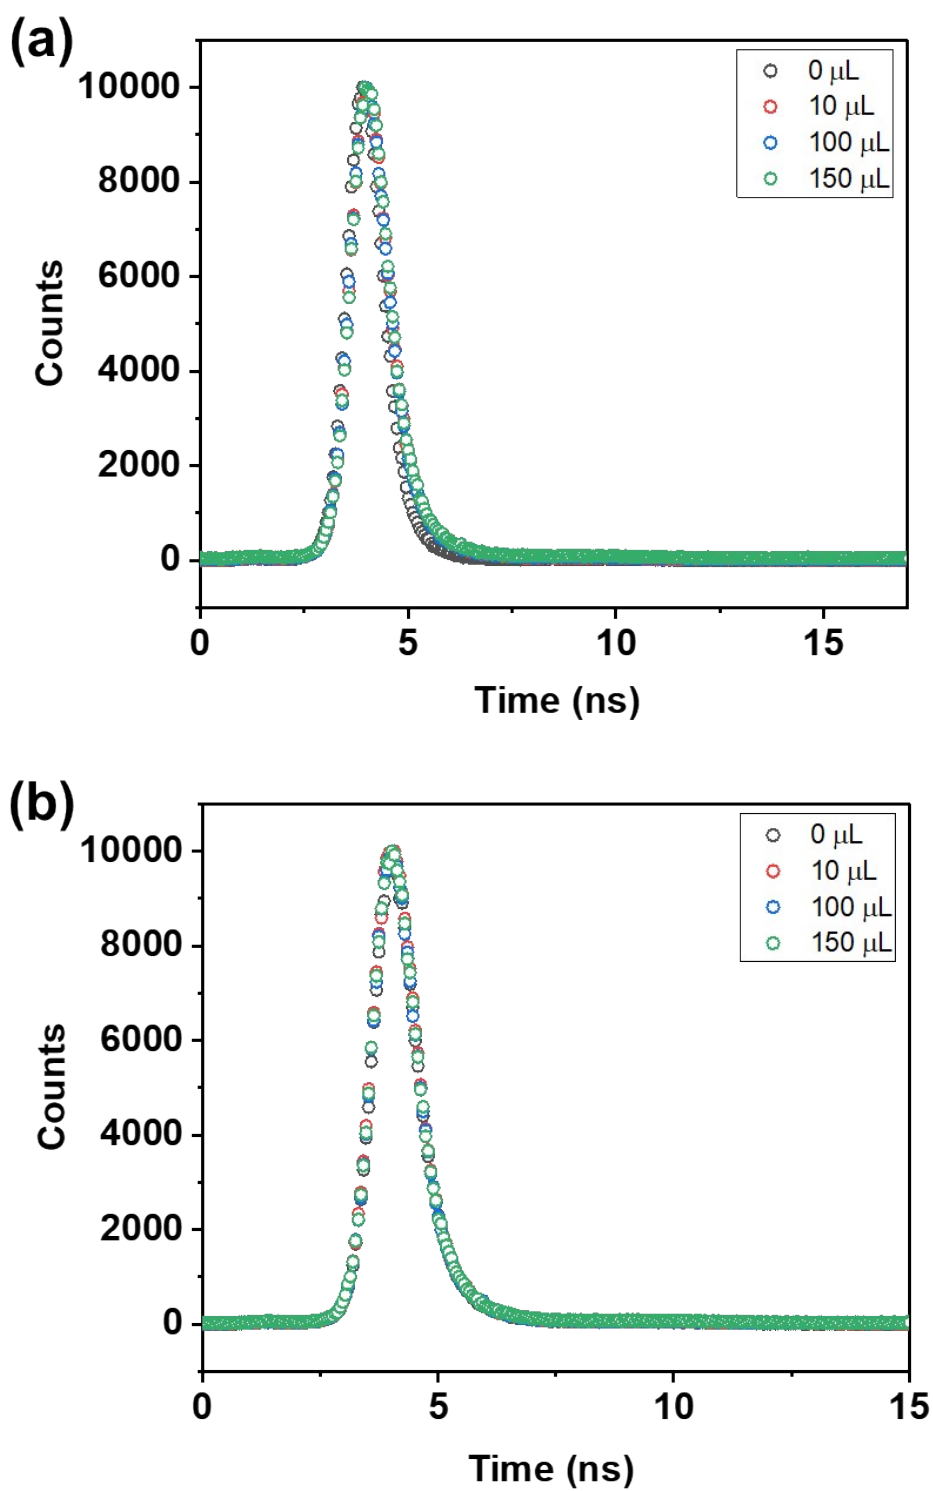

**Fig. S32** Lifetime decay curves of **4** before and after the addition of NFT (a) and NFZ (b) in aqueous media.

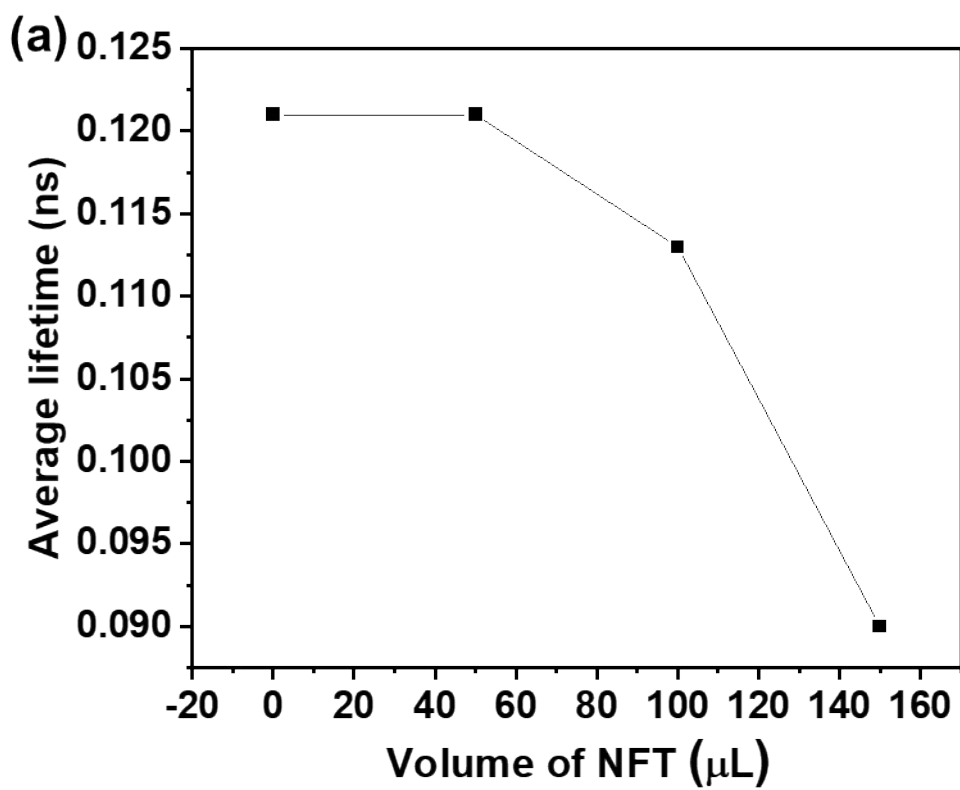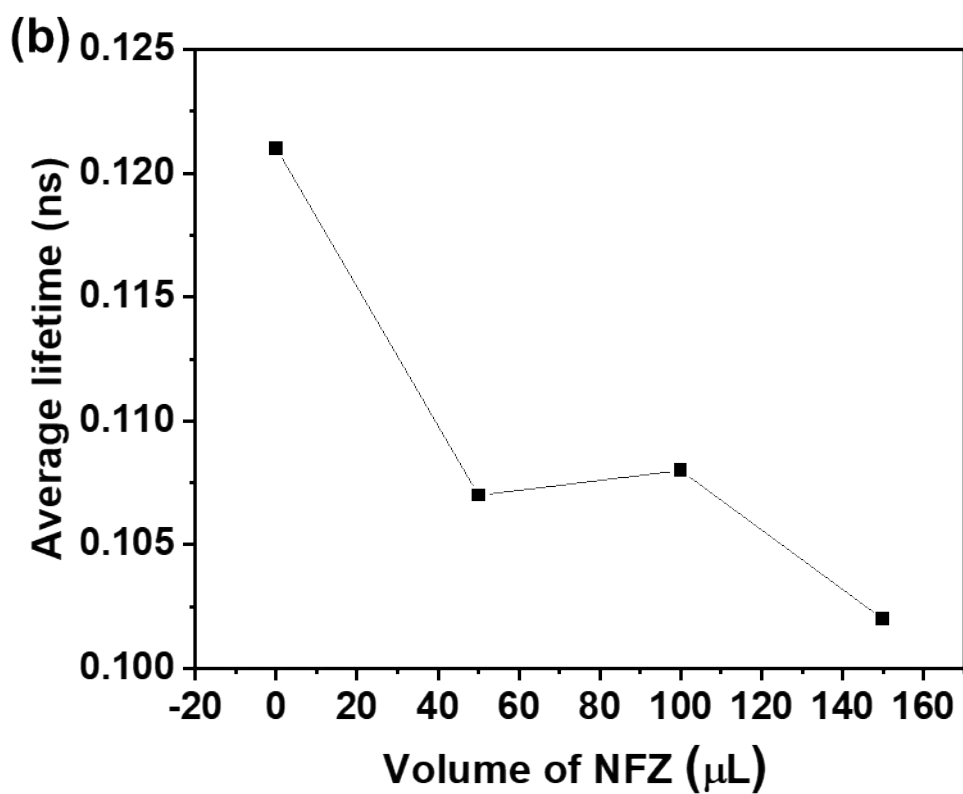

Fig. S33 (a-b) Plot of average lifetime vs volume of NFT and NFZ, respectively.

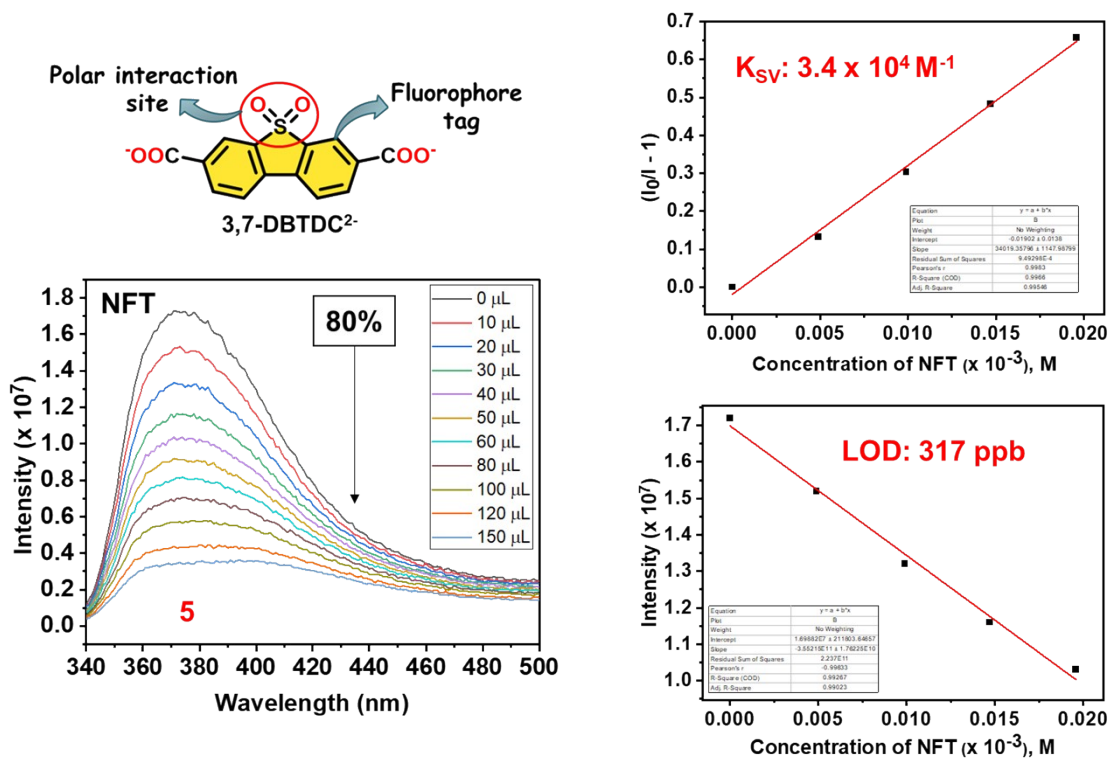

Fig. S34 Fluorescence based detection of NFT by 5.

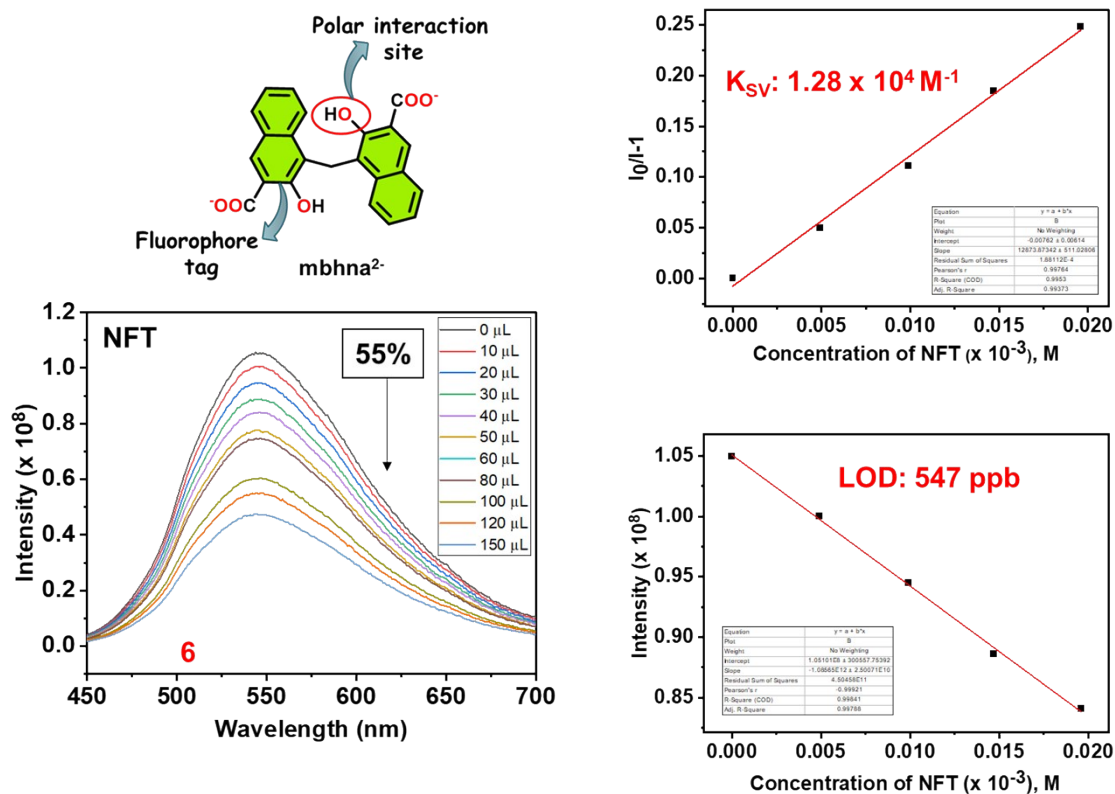

Fig. S35 Fluorescence based detection of NFT by 6.

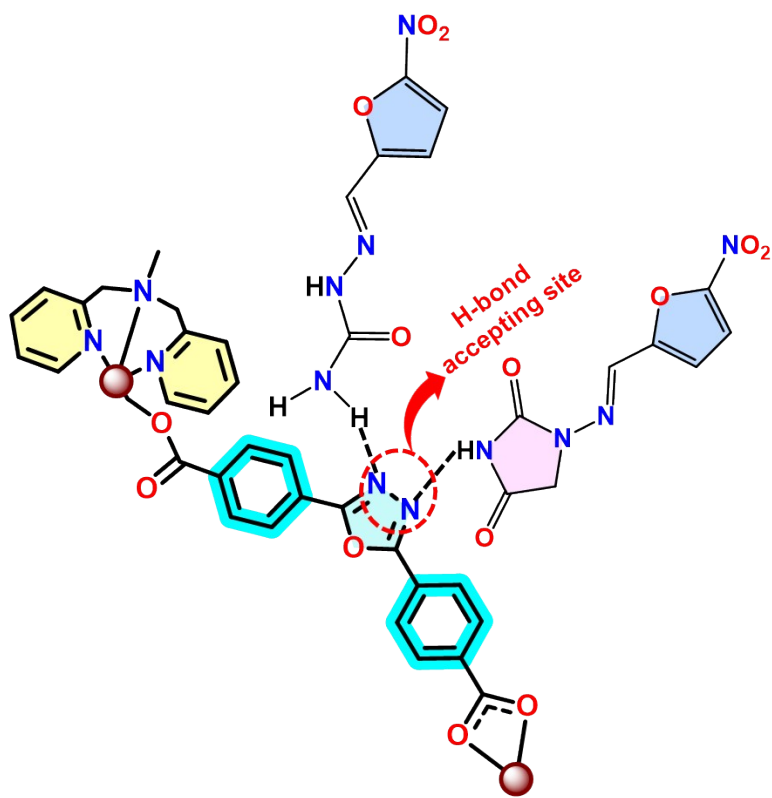

**Fig. S36** Interaction of NFT and NFZ with compound **4** through H-bond.

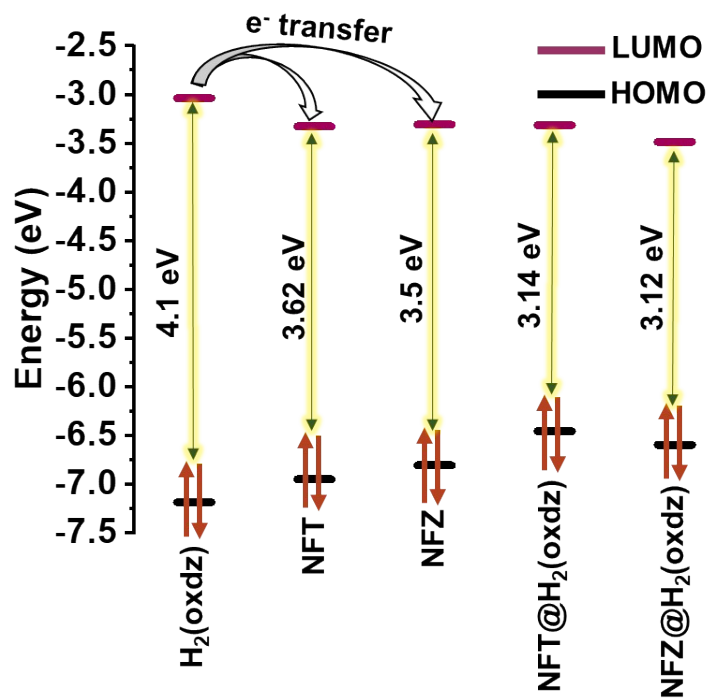

**Fig. S37** HOMO–LUMO energy levels of the  $\text{H}_2(\text{oxdz})$ , NFT and NFZ, and rearranged HOMO-LUMO energy levels of  $\text{NFT@H}_2(\text{oxdz})$  and  $\text{NFZ@H}_2(\text{oxdz})$  after electron transfer determined by DFT calculations using B3LYP at the 6-31G (d,p) basis set of the Gaussian 09 program.

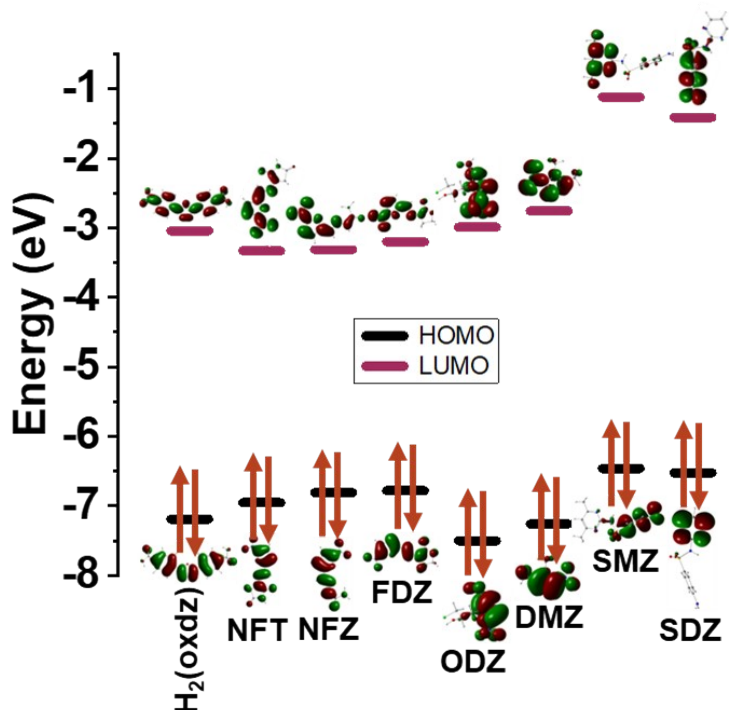

**Fig. S38** HOMO–LUMO energy levels of the  $\text{H}_2(\text{oxdz})$  along with different antibiotics determined by DFT calculations using B3LYP at the 6-31G (d,p) basis set of the Gaussian 09 program.

**Table S1.** Crystallographic Data and Structure Refinement Parameters for **2**, **3** and **4**

| compound                                                                             | <b>2</b>                                                        | <b>3</b>                                                         | <b>4</b>                                                        |
|--------------------------------------------------------------------------------------|-----------------------------------------------------------------|------------------------------------------------------------------|-----------------------------------------------------------------|
| chemical formula                                                                     | C <sub>29</sub> H <sub>25</sub> N <sub>5</sub> NiO <sub>6</sub> | C <sub>29</sub> H <sub>23</sub> N <sub>5</sub> O <sub>5</sub> Zn | C <sub>29</sub> H <sub>23</sub> CdN <sub>5</sub> O <sub>5</sub> |
| formula weight (g/mol)                                                               | 598.25                                                          | 586.932                                                          | 633.948                                                         |
| temperature (K)                                                                      | 296(2)                                                          | 296.15                                                           | 296.15                                                          |
| radiation                                                                            | Mo K $\alpha$                                                   | Mo K $\alpha$                                                    | Mo K $\alpha$                                                   |
| wavelength (Å)                                                                       | 0.71073                                                         | 0.71073                                                          | 0.71073                                                         |
| crystal system                                                                       | orthorhombic                                                    | monoclinic                                                       | orthorhombic                                                    |
| space group                                                                          | <i>Pnma</i>                                                     | <i>P2<sub>1</sub>/c</i>                                          | <i>Pbcn</i>                                                     |
| a (Å)                                                                                | 8.612(2)                                                        | 8.8119(5)                                                        | 22.705(4)                                                       |
| b (Å)                                                                                | 17.731(4)                                                       | 16.0391(10)                                                      | 29.041(3)                                                       |
| c (Å)                                                                                | 17.677(5)                                                       | 24.3538(17)                                                      | 9.3707(12)                                                      |
| a (°)                                                                                | 90                                                              | 90                                                               | 90                                                              |
| b (°)                                                                                | 90                                                              | 91.353(4)                                                        | 90                                                              |
| g (°)                                                                                | 90                                                              | 90                                                               | 90                                                              |
| Z                                                                                    | 4                                                               | 4                                                                | 8                                                               |
| V (Å <sup>3</sup> )                                                                  | 2699.3(12)                                                      | 3441.1(4)                                                        | 6178.6(14)                                                      |
| density (g/cm <sup>3</sup> )                                                         | 1.472                                                           | 1.133                                                            | 1.363                                                           |
| $\mu$ (mm <sup>-1</sup> )                                                            | 0.772                                                           | 0.752                                                            | 0.751                                                           |
| F(000)                                                                               | 1240                                                            | 1210.2                                                           | 2555.2                                                          |
| theta (°) range for data coll.                                                       | 2.871 to 25.127                                                 | 1.52 to 25.43                                                    | 2.28 to 25.01                                                   |
| reflections collected                                                                | 9167                                                            | 23268                                                            | 20575                                                           |
| independent reflections                                                              | 2462                                                            | 6328                                                             | 5400                                                            |
| Reflections with I > 2 $\sigma$ (I)                                                  | 2128                                                            | 4303                                                             | 3673                                                            |
| R <sub>int</sub>                                                                     | 0.0363                                                          | 0.0607                                                           | 0.0723                                                          |
| no. of parameters refined                                                            | 201                                                             | 361                                                              | 357                                                             |
| GOF on F <sup>2</sup>                                                                | 1.024                                                           | 0.9666                                                           | 1.031                                                           |
| final R <sub>1</sub> <sup>a</sup> /wR <sub>2</sub> <sup>b</sup> (I > 2 $\sigma$ (I)) | 0.0303/0.0720                                                   | 0.0600/0.1716                                                    | 0.0709/0.1319                                                   |
| R <sub>1</sub> <sup>a</sup> /wR <sub>2</sub> <sup>b</sup> (all data)                 | 0.0371/0.0758                                                   | 0.0870/0.1904                                                    | 0.1014/0.1427                                                   |
| largest diff. peak and hole (eÅ <sup>-3</sup> )                                      | 0.25 and -0.37                                                  | 0.86 and -0.93                                                   | 1.47 and -0.1.61                                                |

${}^aR_1 = \Sigma||F_o| - |F_c||/\Sigma|F_o|$ .  ${}^bWR_2 = [\Sigma w(F_o^2 - F_c^2)^2/\Sigma w(F_o^2)^2]^{1/2}$ , where  $w = 1/[\sigma^2(F_o^2) + (aP)^2 + bP]$ ,  $P = (F_o^2 + 2F_c^2)/3$

---

**Table S2.** Comparison of detection of NFT by MOCNs reported in the literature

| Analyte (NFT)                                                                                                                              | $K_{sv}$ ( $M^{-1}$ ) | LOD                                      | Reference        |
|--------------------------------------------------------------------------------------------------------------------------------------------|-----------------------|------------------------------------------|------------------|
| $\{[Cd(oxdz)(bpma)] \cdot 4H_2O\}_n$ ( <b>4</b> )                                                                                          | $6.77 \times 10^4$    | 197 ppb<br>or 0.831<br>$\mu\text{mol/L}$ | <b>This work</b> |
| $\{[Zn_2(4\text{-tpom})_2(oxdz)_2] \cdot H_2O\}_n$                                                                                         | $6.55 \times 10^4$    | 89 ppb                                   | S7               |
| BUT-12                                                                                                                                     | $3.8 \times 10^4$     | -                                        | S8               |
| BUT-13                                                                                                                                     | $6 \times 10^4$       | -                                        | S8               |
| $\{[Eu_2(BCA)_3(H_2O)(DMF)_3] \cdot 0.5DMF \cdot H_2O\}_n$                                                                                 | $1.6 \times 10^4$     | 0.21 $\mu\text{M}$                       | S9               |
| $[Mg_2(APDA)_2(H_2O)_3] \cdot 5DMA \cdot 5H_2O$                                                                                            | $8.82 \times 10^4$    | 126 ppb                                  | S10              |
| $\{[In-(BTDI)] \cdot Me_2NH_2 \cdot 2H_2O$ (In-BTDI)                                                                                       | $4.7 \times 10^4$     | 202 ppb                                  | S11              |
| $\{[Tb-(HL)(H_2O)_2] \cdot x(\text{solv})\}_n$<br>HL: 5,5'-(((1,4-phenylenebis-(azanediyl))bis(carbonyl))bis(azanediyl))diisophthalic acid | $1.9 \times 10^4$     | 0.41 $\mu\text{M}$                       | S12              |
| $[Zn_2(\text{azdc})_2(\text{dpta})] \cdot (\text{DMF})_4$ (CSMCRI-2)                                                                       | $7.14 \times 10^4$    | -                                        | S13              |
| $[Zn_8(C_5H_4N_5)_4(C_{14}H_8O_4)_6O(C_{50}H_{44}N_4)_{0.5}]$                                                                              | $4.42 \times 10^4$    | 133 ppb                                  | S14              |

|                                                                                                                                                                                     |                     |                     |     |
|-------------------------------------------------------------------------------------------------------------------------------------------------------------------------------------|---------------------|---------------------|-----|
| ZTMOF-1                                                                                                                                                                             | $7.055 \times 10^4$ | 0.175 $\mu\text{M}$ | S15 |
| $\{[\text{Zn}_3(\text{TCPPDA})_4 \cdot 8\text{DMF} \cdot 2\text{H}_2\text{O}]_n (\text{ZJU-126})\}$                                                                                 | $4 \times 10^4$     | 0.82 $\mu\text{M}$  | S16 |
| $[\text{TbL} \cdot 2\text{H}_2\text{O}]_n$                                                                                                                                          | $5.26 \times 10^4$  | 826 ppb             | S17 |
| RhB@ZIF-8                                                                                                                                                                           | $1.8 \times 10^4$   | 0.26 $\mu\text{M}$  | S18 |
| FSS@ZIF-8                                                                                                                                                                           | $2 \times 10^4$     | 0.31 $\mu\text{M}$  |     |
| $\{[\text{Eu}(\text{H}_2\text{O})(\text{BTCTB})] \cdot 2\text{H}_2\text{O}\}_n$                                                                                                     | $2.1 \times 10^4$   | 0.60 $\mu\text{M}$  | S19 |
| Eu-MOF                                                                                                                                                                              | $2.39 \times 10^5$  | 0.38 $\mu\text{M}$  | S20 |
| $[\text{Eu}(\text{bcbp})(\text{tdc})(\text{H}_2\text{O})_3] \cdot \text{Cl} \cdot 5\text{H}_2\text{O}$                                                                              | $2.24 \times 10^3$  | 2.80 $\mu\text{M}$  | S21 |
| $[\text{Zn}(\text{TTDPa}) (\text{bodca}) \cdot \text{H}_2\text{O}$                                                                                                                  | $5.94 \times 10^4$  | 0.975 $\mu\text{M}$ | S22 |
| $[\text{Zn}(\text{TTDPb}) (\text{bodca}) \cdot \text{H}_2\text{O}$                                                                                                                  | $8.59 \times 10^4$  | 0.285 $\mu\text{M}$ |     |
| $[\text{Cd}_3(\text{TDCPB}) \cdot 2\text{DMAC}] \cdot \text{DMAC} \cdot 4\text{H}_2\text{O}$                                                                                        | $1.04 \times 10^5$  | -                   | S23 |
| $[\text{Tb}(\text{TATMA})(\text{H}_2\text{O}) \cdot 2\text{H}_2\text{O}]_n$                                                                                                         | $3 \times 10^4$     | -                   | S24 |
| $[\text{Zn}_3(\text{bpg})_{1.5}(\text{azdc})_3] \cdot (\text{DMF})_{5.9} \cdot (\text{H}_2\text{O})_{1.05}$<br>(CSMCRI-1)                                                           | $5.92 \times 10^4$  | -                   | S25 |
| $[\text{Cd}_2\text{Cl}(\text{L})(\text{H}_2\text{O})] \cdot 11\text{H}_2\text{O}$<br>( $\text{L}^3 = 2,4,6\text{-tris}(1\text{-(3,5-dicarboxylatobenzyl)pyridinium4-yl)pyridine}$ ) | $1.5 \times 10^4$   | 0.26 $\mu\text{M}$  | S26 |
| $[\text{Eu}(\text{cppa})(\text{OH})] \cdot x\text{S}$ (CTGU-19)                                                                                                                     | $2.33 \times 10^4$  | 0.43 $\mu\text{M}$  | S27 |
| $[\text{Cd}_3 \cdot \text{L} \cdot (\text{BTB})_2 \cdot 2\text{DMF}]$ (CUST-532)                                                                                                    | $6.81 \times 10^4$  | 0.44 $\mu\text{M}$  | S28 |
| $[(\text{Cd}_3\text{O}_2) \cdot \text{L} \cdot \text{BTC}]$ (CUST-533)                                                                                                              | $3.80 \times 10^4$  | 0.78 $\mu\text{M}$  |     |
| L = 9,10-bis(N-benzimidazolyl)-anthracene                                                                                                                                           |                     |                     |     |
| RhB@Tb-dccept<br>Tb-dccept :<br>$[\text{Tb}_3(\text{dccept})_3(\text{HCOO})] \cdot \text{DMF} \cdot 15\text{H}_2\text{O}$                                                           | $4.53 \times 10^4$  | 158 ppb             | S29 |
| $\{[\text{Tb}_2(\text{AIP})_2(\text{H}_2\text{O})_{10}] \cdot (\text{AIP}) \cdot 4\text{H}_2\text{O}\}_n$                                                                           | $4 \times 10^4$     | 0.30 $\mu\text{M}$  | S30 |
| $[(\text{Zn}_4\text{O})_2(\text{PDDA})_6(\text{H}_2\text{O})_2] \cdot 10\text{DMF}$                                                                                                 | $1.16 \times 10^5$  | -                   | S31 |
| $[\text{Cd}(\text{MBPz})(2,6\text{-NDC})] \cdot 2\text{H}_2\text{O}\}_n$ (IITKGP-71)                                                                                                | $2.1 \times 10^4$   | 0.17 $\mu\text{M}$  | S32 |
| $\{[\text{Eu}_2(\text{H}_2\text{O})\text{L}_3] \cdot 3\text{H}_2\text{O}\}_n$<br>$\text{H}_2\text{L} = 1,2,5\text{-thiadiazole-3,4-dicarboxylic acid}$                              | $1.52 \times 10^4$  | 0.97 $\mu\text{M}$  | S33 |

**Table S3.** Comparison of detection of NFZ by MOCNs reported in the literature

| Analyte (NFZ)                                                                                                                                                                                                   | $K_{sv}$ (M <sup>-1</sup> ) | LOD                           | Reference        |
|-----------------------------------------------------------------------------------------------------------------------------------------------------------------------------------------------------------------|-----------------------------|-------------------------------|------------------|
| {[Cd(oxdz)(bpma)]·4H <sub>2</sub> O} <sub>n</sub> ( <b>4</b> )                                                                                                                                                  | 5.86 × 10 <sup>4</sup>      | 172 ppb<br>or 0.869<br>μmol/L | <b>This work</b> |
| {[Zn <sub>2</sub> (4-tpom) <sub>2</sub> (oxdz) <sub>2</sub> ]·H <sub>2</sub> O} <sub>n</sub>                                                                                                                    | 4 × 10 <sup>4</sup>         | 78 ppb                        | S7               |
| BUT-12                                                                                                                                                                                                          | 1.1 × 10 <sup>5</sup>       | 58 ppb                        | S8               |
| BUT-13                                                                                                                                                                                                          | 7.5 × 10 <sup>4</sup>       | 90 ppb                        |                  |
| {[Eu <sub>2</sub> (BCA) <sub>3</sub> (H <sub>2</sub> O)(DMF) <sub>3</sub> ]·0.5DMF·H <sub>2</sub> O} <sub>n</sub>                                                                                               | 2.2 × 10 <sup>4</sup>       | 0.16 μM                       | S9               |
| [Zn <sub>2</sub> (azdc) <sub>2</sub> (dpta)]·(DMF) <sub>4</sub> (CSMCRI-2)                                                                                                                                      | 1.30 × 10 <sup>5</sup>      | 630 ppb                       | S13              |
| [Zn <sub>8</sub> (C <sub>5</sub> H <sub>4</sub> N <sub>5</sub> ) <sub>4</sub> (C <sub>14</sub> H <sub>8</sub> O <sub>4</sub> ) <sub>6</sub> O(C <sub>50</sub> H <sub>44</sub> N <sub>4</sub> ) <sub>0.5</sub> ] | 4.48 × 10 <sup>4</sup>      | 110 ppb                       | S14              |
| {[Zn <sub>3</sub> (TCPPDA) <sub>4</sub> ]·8DMF·2H <sub>2</sub> O} <sub>n</sub> (ZJU-126)                                                                                                                        | 5.8 × 10 <sup>4</sup>       | 0.56 μM                       | S16              |
| RhB@ZIF-8                                                                                                                                                                                                       | 7.3 × 10 <sup>4</sup>       | 0.47 μM                       | S18              |
| FSS@ZIF-8                                                                                                                                                                                                       | 8 × 10 <sup>4</sup>         | 0.35 μM                       |                  |
| {[Eu(H <sub>2</sub> O)(BTCTB)]·2H <sub>2</sub> O} <sub>n</sub>                                                                                                                                                  | 1.27 × 10 <sup>4</sup>      | 0.67 μM                       | S19              |
| Eu-MOF                                                                                                                                                                                                          | 2.20 × 10 <sup>5</sup>      | 0.41 μM                       | S20              |
| [Eu(bcbp)(tdc)(H <sub>2</sub> O) <sub>3</sub> ]·Cl·5H <sub>2</sub> O                                                                                                                                            | 6.41 × 10 <sup>3</sup>      | 1.33 μM                       | S21              |
| [Zn(TTDPa)(bodca)·H <sub>2</sub> O                                                                                                                                                                              | 6.76 × 10 <sup>4</sup>      | 0.857 μM                      | S22              |
| [Zn(TTDPb)(bodca)·H <sub>2</sub> O                                                                                                                                                                              | 1.12 × 10 <sup>5</sup>      | 0.218 μM                      |                  |
| [Cd <sub>3</sub> (TDCPB)·2DMAc]·DMAc·4H <sub>2</sub> O                                                                                                                                                          | 7.46 × 10 <sup>4</sup>      | -                             | S23              |
| [Tb(TATMA)(H <sub>2</sub> O)·2H <sub>2</sub> O] <sub>n</sub>                                                                                                                                                    | 3.35 × 10 <sup>4</sup>      | -                             | S24              |
| [Zn <sub>3</sub> (bpg) <sub>1.5</sub> (azdc) <sub>3</sub> ]·(DMF) <sub>5.9</sub> ·(H <sub>2</sub> O) <sub>1.05</sub><br>CSMCRI-1                                                                                | 8.75 × 10 <sup>4</sup>      | 0.8 ppm                       | S25              |
| [Cd <sub>2</sub> Cl(L)(H <sub>2</sub> O)]·11H <sub>2</sub> O<br>(L <sup>3-</sup> = 2,4,6-tris(1-(3,5-dicarboxylatobenzyl)pyridinium4-yl)pyridine                                                                | 2.1 × 10 <sup>4</sup>       | 0.20 μM                       | S26              |
| RhB@Tb-dcpcpt<br>Tb-dcpcpt:<br>[Tb <sub>3</sub> (dcpcpt) <sub>3</sub> (HCOO)]·DMF·15H <sub>2</sub> O                                                                                                            | 4.45 × 10 <sup>4</sup>      | 134 ppb                       | S29              |
| {[Tb <sub>2</sub> (AIP) <sub>2</sub> (H <sub>2</sub> O) <sub>10</sub> ]·(AIP)·4H <sub>2</sub> O} <sub>n</sub>                                                                                                   | 2.8 × 10 <sup>4</sup>       | 0.35 μM                       | S30              |
| [(Zn <sub>4</sub> O) <sub>2</sub> (PDDA) <sub>6</sub> (H <sub>2</sub> O) <sub>2</sub> ]·10DMF                                                                                                                   | 6.08 × 10 <sup>4</sup>      | -                             | S31              |
| [Cd(MBPz)(2,6-NDC)]·2H <sub>2</sub> O] <sub>n</sub> (IITKGP-71)                                                                                                                                                 | 3.1 × 10 <sup>4</sup>       | 0.11 μM                       | S32              |
| {[Eu <sub>2</sub> (H <sub>2</sub> O)L <sub>3</sub> ]·3H <sub>2</sub> O} <sub>n</sub><br>H <sub>2</sub> L = 1,2,5-thiadiazole-3,4-dicarboxylic acid                                                              | 2.82 × 10 <sup>4</sup>      | 0.52 μM                       | S33              |
| [Zn <sub>4</sub> O(BCTPE) <sub>3</sub> ]                                                                                                                                                                        | -                           | 0.1 ppm                       | S34              |

**Table S4.** Average lifetime values of **4** before and after addition of different volumes of nitrofurans

| Probe          | Average lifetime before addition of analyte (ns) | Average lifetime after addition of 50 μL of analyte (ns) | Average lifetime after addition of 100 μL of analyte (ns) | Average lifetime after addition of 150 μL of analyte (ns) | Nature of quenching |
|----------------|--------------------------------------------------|----------------------------------------------------------|-----------------------------------------------------------|-----------------------------------------------------------|---------------------|
| <b>4 (NFT)</b> | 0.121                                            | 0.121                                                    | 0.113                                                     | 0.09                                                      | Static and dynamic  |
| <b>4 (NFZ)</b> | 0.121                                            | 0.107                                                    | 0.108                                                     | 0.102                                                     | Static and dynamic  |

**Table S5.** HOMO and LUMO energies calculation for H<sub>2</sub>(oxdz), antibiotics, NFT@H<sub>2</sub>(oxdz), and NFZ@H<sub>2</sub>(oxdz) using B3LYP/6-31G(d,p) level

| Compound                  | HOMO (eV) | LUMO (eV) | Band Gap (eV) |
|---------------------------|-----------|-----------|---------------|
| H <sub>2</sub> (oxdz)     | -7.19     | -3.04     | 4.1           |
| NFT                       | -6.954    | -3.33     | 3.62          |
| NFZ                       | -6.81     | -3.31     | 3.5           |
| FDZ                       | -6.7797   | -3.20     | 3.57          |
| ODZ                       | -7.5      | -2.991    | 4.51          |
| DMZ                       | -7.26     | -2.757    | 4.5           |
| SMZ                       | -6.459    | -1.1197   | 5.33          |
| SDZ                       | -6.523    | -1.41     | 5.113         |
| NFT@H <sub>2</sub> (oxdz) | -6.46     | -3.317    | 3.14          |
| NFZ@H <sub>2</sub> (oxdz) | -6.60     | -3.4879   | 3.12          |

## References

- [S1] APEX2, SADABS, and SAINT, Bruker AXS Inc., Madison, WI, USA, 2008.
- [S2] G. M. Sheldrick, *Acta Crystallogr., Sect. A: Found. Crystallogr.*, 2008, **64**, 112–122.
- [S3] O. V. Dolomanov, L. J. Bourhis, R. J. Gildea, J. A. K. Howard and H. Puschmann, *J. Appl. Cryst.*, 2009, **42**, 339–341.
- [S4] C. F. Macrae, I. J. Bruno, J. A. Chisholm, P. R. Edgington, P. McCabe, L. Monge, R. Taylor, J. van de Streek and P. A. Wood, *J. Appl. Crystallogr.*, 2008, **41**, 466–470.
- [S5] K. Brandenburg, H. Putz, M. Berndt, *DIAMOND V 3.2 Crystal Impact GbR*, Bonn, Germany, 1999.
- [S6] M. J. Frisch, G. W. Trucks, H. B. Schlegel, G. E. Scuseria, M. A. Robb, J. R. Cheeseman, G. Scalmani, V. Barone, B. Mennucci, G. A. Petersson, H. Nakatsuji, M. Caricato, X. Li, H. P. Hratchian, A. F. Izmaylov, J. Bloino, G. Zheng, J. L. Sonnenberg, M. Hada, M. Ehara, K. Toyota, R. Fukuda, J. Hasegawa, M. Ishida, T. Nakajima, Y. Honda, O. Kitao, H. Nakai, T. Vreven, J. A. Montgomery Jr., J. E. Peralta, F. Ogliaro, M. Bearpark, K. N. Kudin, V. N. Staroverov, T. Keith, R. Kobayashi, J. Normand, K. Raghavachari, A. Rendell, J. C. Burant, S. S. Iyengar, J. Tomasi, M. Cossi, N. Rega, J. M. Millam, M. Klene, J. E. Knox, J. B. Cross, V. Bakken, C. Adamo, J. Jaramillo, R. Gomperts, R. E. Stratmann, O. Yazyev, A. J. Austin, R. Cammi, C. Pomelli, J. W. Ochterski, R. L. Martin, K. Morokuma, V. G. Zakrzewski, G. A. Voth, P. Salvador, J. J. Dannenberg, S. Dapprich, A. D. Daniels, O. Farkas, J. B. Foresman, J. V. Ortiz, J. Cioslowski and D. J. Fox, *Gaussian 09*, Gaussian, Inc., Wallingford CT, 2013.
- [S7] A. Chanda and S. K. Mandal, *Chem. Asian J.*, 2025, **20**, e202401206.
- [S8] B. Wang, X.-L. Lv, D. Feng, L.-H. Xie, J. Zhang, M. Li, Y. Xie, J. Li and H.-C. Zhou, *J. Am. Chem. Soc.*, 2016, **138**, 6204–6216.
- [S9] F. Zhang, H. Yao, T. Chu, G. Zhang, Y. Wang and Y. Yang, *Chem. Eur. J.*, 2017, **23**, 10293–10300.
- [S10] N. Xu, Q. Zhang, B. Hou, Q. Cheng and G. Zhang, *Inorg. Chem.*, 2018, **57**, 13330–13340.
- [S11] Z. Zhang, Z. Wu, Z. Li, Y. Zhao, M. Yu, F. Jiang, L. Cheng and M. Hong, *Cryst. Growth Des.*, 2023, **23**, 4491–4498.
- [S12] M. Lei, F. Ge, X. Gao, Z. Shi and H. Zheng, *Inorg. Chem.*, 2021, **60**, 10513–10521.
- [S13] R. Goswami, S. C. Mandal, N. Seal, B. Pathak and S. Neogi, *J. Mater. Chem. A*, 2019, **7**,

19471–19484.

[S14] Y.-M. Ying, C.-L. Tao, M. Yu, Y. Xiong, C.-R. Guo, X.-G. Liu and Z. Zhao, *J. Mater. Chem. C*, 2019, **7**, 8383–8388.

[S15] H. Li, J. Ren, X. Xu, L. Ning, R. Tong, Y. Song, S. Liao, W. Gu and X. Liu, *Analyst*, 2019, **144**, 4513–4519.

[S16] M. Lu, X. Xiao, S. Yu, W. Lin and Y. Yang, *Z. Anorg. Allg. Chem.*, 2022, **648**, e202100353.

[S17] F. Guo, C. Su, Y. Fan and W. Shi, *Dalton Trans.*, 2019, **48**, 12910–12917.

[S18] Y.-Q. Zhang, X.-H. Wu, S. Mao, W.-Q. Tao and Z. Li, *Talanta*, 2019, **204**, 344–352.

[S19] H.-W. Yang, P. Xu, B. Ding, Z.-Y. Liu, X.-J. Zhao and E.-C. Yang, *Eur. J. Inorg. Chem.*, 2019, **2019**, 5077–5084.

[S20] Y. Su, Y. Guo, Q. Wu, L. Wang, Y. Wang, G. Yang, W. Zhang and Y. Wang, *Inorg. Chem.*, 2024, **63**, 15134–15143.

[S21] X. Li, S. Zhang, L. Zhang, Y. Yang, K. Zhang, Y. Cai, Y. Xu, Y. Gai and K. Xiong, *Cryst. Growth Des.*, 2022, **22**, 3991–3997.

[S22] Z.-L. Mu, Y.-Q. Ma, Y. Zhu, Z. Chen, H.-P. Xiao, X. Li, H.-Y. Wang and J.-Y. Ge, *Inorg. Chem.*, 2023, **62**, 20314–20324.

[S23] Q.-Q. Zhu, Q.-S. Zhou, H.-W. Zhang, W.-W. Zhang, D.-Q. Lu, M.-T. Guo, Y. Yuan, F. Sun and H. He, *Inorg. Chem.*, 2020, **59**, 1323–1331.

[S24] Q.-Q. Zhu, H. He, Y. Yan, J. Yuan, D.-Q. Lu, D.-Y. Zhang, F. Sun and G. Zhu, *Inorg. Chem.*, 2019, **58**, 7746–7753.

[S25] R. Goswami, S. C. Mandal, B. Pathak and S. Neogi, *ACS Appl. Mater. Interfaces*, 2019, **11**, 9042–9053.

[S26] P. Li, M.-Y. Guo, L.-L. Gao, X.-M. Yin, S.-L. Yang, R. Bu and E.-Q. Gao, *Dalton Trans.*, 2020, **49**, 7488–7495.

[S27] B. Li, Y.-Y. Jiang, Y.-Y. Sun, Y.-J. Wang, M.-L. Han, Y.-P. Wu, L.-F. Ma and D.-S. Li, *Dalton Trans.*, 2020, **49**, 14854–14862.

[S28] M. Fan, B. Sun, X. Li, Q. Pan, J. Sun, P. Ma and Z. Su, *Inorg. Chem.*, 2021, **60**, 9148–9156.

[S29] M. Yu, Y. Xie, X. Wang, Y. Li and G. Li, *ACS Appl. Mater. Interfaces*, 2019, **11**, 21201–21210.

[S30] F. Zhang, H. Yao, Y. Zhao, X. Li, G. Zhang and Y. Yang, *Talanta*, 2017, **174**, 660–666.

[S31] H. He, Q.-Q. Zhu, M.-T. Guo, Q.-S. Zhou, J. Chen, C.-P. Li and M. Du, *Cryst. Growth Des.*, 2019, **19**, 5228–5236.

[S32] S. Mondal, R. Sahoo and M. C. Das, *Small*, 2025, **21**, 2409095.

[S33] X. Yu, D. I. Pavlov, A. A. Ryadun, K. A. Kovalenko, A. S. Potapov and V. P. Fedin, *Inorg. Chem.*, 2025, **64**, 6356–6364.

[S34] X.-G. Liu, C.-L. Tao, H.-Q. Yu, B. Chen, Z. Liu, G.-P. Zhu, Z. Zhao, L. Shen and B. Z. Tang, *J. Mater. Chem. C*, 2018, **6**, 2983–2988.
